# Supplementary material for: Interrogation of macrophage-related prognostic signatures reveals a potential immune-mediated therapy strategy by histone deacetylase inhibition in glioma
Source: Front Oncol. 2025 Jun 6;15:1554845. doi: 10.3389/fonc.2025.1554845 (PMC12179195; doi:10.3389/fonc.2025.1554845)
Supplement: Supplementary file 16 [file Table3.xlsx]

## Sheet: Sheet1
Well	Well Position	Omit	Sample Name	Target Name	Task	Reporter	Quencher	Quantity	Quantity Mean	Quantity SD	RQ	RQ Min	RQ Max	CT	Ct Mean	Ct SD	Delta Ct	Delta Ct Mean	Delta Ct SD	Delta Ct SE	Delta Delta Ct	Tm1	Automatic Ct Threshold	Tm2	Ct Threshold	Tm3	Automatic Baseline	Baseline Start	Baseline End	Amp Status	Comments	MTP	CQCONF	EXPFAIL	Tm4
1	A1	FALSE	D	ABI3	UNKNOWN	SYBR	None				1	0.823388	1.21449	29.3756	29.3536	0.0593205		-3.40425	0.174897	0.100977	0	86.6637	TRUE		0.909383		TRUE	3	21	Amp		N	N	N
2	A2	FALSE	D	AP1B1	UNKNOWN	SYBR	None				1	0.809952	1.23464	27.4653	27.364	0.0944334		-5.39391	0.189704	0.109526	0	83.1594	TRUE		0.973362		TRUE	3	19	Amp		N	N	N
3	A3	FALSE	D	C3	UNKNOWN	SYBR	None				1	0.828335	1.20724	27.7264	27.6794	0.0407692		-5.07843	0.169506	0.0978641	0	86.2307	TRUE		1.01613		TRUE	3	20	Amp		N	N	N
4	A4	FALSE	D	CD53	UNKNOWN	SYBR	None				1	0.772779	1.29403	18.4883	18.3074	0.16355		-14.4505	0.231988	0.133938	0	84.8582	TRUE		1.54452		TRUE	3	10	Amp		N	N	N
6	A6	FALSE	D	GAL3ST4	UNKNOWN	SYBR	None							32.5687	32.7579	0.16453						88.6499	TRUE		1.46297		TRUE	3	25	Amp		N	N	N
7	A7	FALSE	D	PLEKHO2	UNKNOWN	SYBR	None				1	0.809929	1.23468	24.8409	24.9351	0.0944841		-7.82272	0.189729	0.10954	0	84.5596	TRUE		0.930512		TRUE	3	17	Amp		N	N	N
8	A8	FALSE	D	PLXDC2	UNKNOWN	SYBR	None				1	0.740546	1.35035	23.4925	23.7241	0.214499		-9.03374	0.270333	0.156077	0	84.2545	TRUE		1.61306		TRUE	3	15	Amp		N	N	N
9	A9	FALSE	D	RIN3	UNKNOWN	SYBR	None				1	0.644084	1.55259	22.9984	23.3605	0.360133		-9.39735	0.395937	0.228594	0	82.6518	TRUE		0.0448224		TRUE	3	20	Amp		N	Y	N
10	A10	FALSE	D	SCIN3	UNKNOWN	SYBR	None				1	0.822329	1.21606	23.7237	23.7919	0.062652		-8.96598	0.176055	0.101645	0	81.1316	TRUE		0.413326		TRUE	3	18	Amp		N	N	N
11	A11	FALSE	D	SIGLEC10	UNKNOWN	SYBR	None				1	0.820133	1.21931	24.9848	25.0279	0.0691252		-7.72999	0.178461	0.103034	0	83.5026	TRUE		0.921973		TRUE	3	17	Amp		N	N	N
12	A12	FALSE	D	SLA	UNKNOWN	SYBR	None				1	0.80122	1.2481	18.7318	18.7654	0.112756		-13.9925	0.199459	0.115158	0	84.8761	TRUE		0.248888		TRUE	3	14	Amp		N	Y	N
13	B1	FALSE	D	ABI3	UNKNOWN	SYBR	None				1	0.823388	1.21449	29.2864	29.3536	0.0593205		-3.40425	0.174897	0.100977	0	86.6637	TRUE		0.909383		TRUE	3	22	Amp		N	N	N
14	B2	FALSE	D	AP1B1	UNKNOWN	SYBR	None				1	0.809952	1.23464	27.3482	27.364	0.0944334		-5.39391	0.189704	0.109526	0	83.007	TRUE		0.973362		TRUE	3	19	Amp		N	N	N
15	B3	FALSE	D	C3	UNKNOWN	SYBR	None				1	0.828335	1.20724	27.6584	27.6794	0.0407692		-5.07843	0.169506	0.0978641	0	86.0782	TRUE		1.01613		TRUE	3	19	Amp		N	N	N
16	B4	FALSE	D	CD53	UNKNOWN	SYBR	None				1	0.772779	1.29403	18.1701	18.3074	0.16355		-14.4505	0.231988	0.133938	0	84.8582	TRUE		1.54452		TRUE	3	9	Amp		N	N	N
18	B6	FALSE	D	GAL3ST4	UNKNOWN	SYBR	None							32.8374	32.7579	0.16453						88.4975	TRUE		1.46297		TRUE	3	22	Amp		N	N	N
19	B7	FALSE	D	PLEKHO2	UNKNOWN	SYBR	None				1	0.809929	1.23468	24.9347	24.9351	0.0944841		-7.82272	0.189729	0.10954	0	84.4071	TRUE		0.930512		TRUE	3	17	Amp		N	N	N
20	B8	FALSE	D	PLXDC2	UNKNOWN	SYBR	None				1	0.740546	1.35035	23.7641	23.7241	0.214499		-9.03374	0.270333	0.156077	0	84.102	TRUE		1.61306		TRUE	3	15	Amp		N	N	N
21	B9	FALSE	D	RIN3	UNKNOWN	SYBR	None				1	0.644084	1.55259	23.7186	23.3605	0.360133		-9.39735	0.395937	0.228594	0	82.4998	TRUE		0.0448224		TRUE	3	21	Amp		N	Y	N
22	B10	FALSE	D	SCIN3	UNKNOWN	SYBR	None				1	0.822329	1.21606	23.8051	23.7919	0.062652		-8.96598	0.176055	0.101645	0	81.1316	TRUE		0.413326		TRUE	3	18	Amp		N	N	N
23	B11	FALSE	D	SIGLEC10	UNKNOWN	SYBR	None				1	0.820133	1.21931	24.9912	25.0279	0.0691252		-7.72999	0.178461	0.103034	0	83.35	TRUE		0.921973		TRUE	3	16	Amp		N	N	N
24	B12	FALSE	D	SLA	UNKNOWN	SYBR	None				1	0.80122	1.2481	18.8911	18.7654	0.112756		-13.9925	0.199459	0.115158	0	84.8761	TRUE		0.248888		TRUE	3	12	Amp		N	Y	N
25	C1	FALSE	D	ABI3	UNKNOWN	SYBR	None				1	0.823388	1.21449	29.3988	29.3536	0.0593205		-3.40425	0.174897	0.100977	0	86.6637	TRUE		0.909383		TRUE	3	20	Amp		N	N	N
26	C2	FALSE	D	AP1B1	UNKNOWN	SYBR	None				1	0.809952	1.23464	27.2784	27.364	0.0944334		-5.39391	0.189704	0.109526	0	83.007	TRUE		0.973362		TRUE	3	19	Amp		N	N	N
27	C3	FALSE	D	C3	UNKNOWN	SYBR	None				1	0.828335	1.20724	27.6535	27.6794	0.0407692		-5.07843	0.169506	0.0978641	0	86.0782	TRUE		1.01613		TRUE	3	20	Amp		N	N	N
28	C4	FALSE	D	CD53	UNKNOWN	SYBR	None				1	0.772779	1.29403	18.2637	18.3074	0.16355		-14.4505	0.231988	0.133938	0	84.8582	TRUE		1.54452		TRUE	3	9	Amp		N	N	N
30	C6	FALSE	D	GAL3ST4	UNKNOWN	SYBR	None							32.8675	32.7579	0.16453						88.3451	TRUE		1.46297		TRUE	3	24	Amp		N	N	N
31	C7	FALSE	D	PLEKHO2	UNKNOWN	SYBR	None				1	0.809929	1.23468	25.0299	24.9351	0.0944841		-7.82272	0.189729	0.10954	0	84.4071	TRUE		0.930512		TRUE	3	16	Amp		N	N	N
32	C8	FALSE	D	PLXDC2	UNKNOWN	SYBR	None				1	0.740546	1.35035	23.9158	23.7241	0.214499		-9.03374	0.270333	0.156077	0	84.2545	TRUE		1.61306		TRUE	3	14	Amp		N	N	N
33	C9	FALSE	D	RIN3	UNKNOWN	SYBR	None				1	0.644084	1.55259	23.3646	23.3605	0.360133		-9.39735	0.395937	0.228594	0	82.4998	TRUE		0.0448224		TRUE	3	20	Amp		N	Y	N
34	C10	FALSE	D	SCIN3	UNKNOWN	SYBR	None				1	0.822329	1.21606	23.8469	23.7919	0.062652		-8.96598	0.176055	0.101645	0	80.9796	TRUE		0.413326		TRUE	3	18	Amp		N	N	N
35	C11	FALSE	D	SIGLEC10	UNKNOWN	SYBR	None				1	0.820133	1.21931	25.1076	25.0279	0.0691252		-7.72999	0.178461	0.103034	0	83.5026	TRUE		0.921973		TRUE	3	18	Amp		N	N	N
36	C12	FALSE	D	SLA	UNKNOWN	SYBR	None				1	0.80122	1.2481	18.6732	18.7654	0.112756		-13.9925	0.199459	0.115158	0	84.7235	TRUE		0.248888		TRUE	3	12	Amp		N	Y	N
37	D1	FALSE	A	ABI3	UNKNOWN	SYBR	None				1.56207	1.18117	2.0658	30.0751	30.247	0.15364		-4.0477	0.251557	0.145237	-0.643457	86.6637	TRUE		0.909383		TRUE	3	22	Amp		N	N	N
38	D2	FALSE	A	AP1B1	UNKNOWN	SYBR	None				1.49536	1.12303	1.99114	28.1719	28.3203	0.163513		-5.9744	0.257705	0.148786	-0.580496	83.007	TRUE		0.973362		TRUE	3	21	Amp		N	N	N
39	D3	FALSE	A	C3	UNKNOWN	SYBR	None				9.1287	7.28815	11.4341	25.9828	26.0258	0.0373407		-8.26884	0.202657	0.117004	-3.19041	85.9257	TRUE		1.01613		TRUE	3	17	Amp		N	N	N
40	D4	FALSE	A	CD53	UNKNOWN	SYBR	None				2.329	1.86209	2.91297	18.6485	18.6245	0.029525		-15.6702	0.201364	0.116257	-1.21971	84.7057	TRUE		1.54452		TRUE	3	10	Amp		N	N	N
42	D6	FALSE	A	GAL3ST4	UNKNOWN	SYBR	None							34.289	34.2947	0.199187						88.3451	TRUE		1.46297		TRUE	3	27	Amp		N	N	N
43	D7	FALSE	A	PLEKHO2	UNKNOWN	SYBR	None				1.7462	1.15264	2.64543	26.0304	25.6677	0.316371		-8.62694	0.373853	0.215844	-0.80422	84.4071	TRUE		0.930512		TRUE	3	18	Amp		N	N	N
44	D8	FALSE	A	PLXDC2	UNKNOWN	SYBR	None				0.822844	0.614321	1.10215	25.7404	25.5422	0.171776		-8.75243	0.263026	0.151858	0.28131	84.102	TRUE		1.61306		TRUE	3	16	Amp		N	N	N
45	D9	FALSE	A	RIN3	UNKNOWN	SYBR	None				5.6732	3.71334	8.66744	22.5564	22.3932	0.325303		-11.9015	0.381441	0.220225	-2.50416	82.3477	TRUE		0.0448224		TRUE	3	19	Amp		N	Y	N
46	D10	FALSE	A	SCIN3	UNKNOWN	SYBR	None				2.23798	1.68341	2.97526	24.1235	24.1665	0.161262		-10.1282	0.256283	0.147965	-1.1622	80.9796	TRUE		0.413326		TRUE	3	17	Amp		N	N	N
47	D11	FALSE	A	SIGLEC10	UNKNOWN	SYBR	None				3.23974	2.58524	4.05993	24.8645	24.8688	0.0397162		-9.42586	0.203108	0.117265	-1.69588	83.35	TRUE		0.921973		TRUE	3	17	Amp		N	N	N
48	D12	FALSE	A	SLA	UNKNOWN	SYBR	None				9.59142	6.95682	13.2238	16.8248	17.0404	0.20944		-17.2542	0.289034	0.166874	-3.26174	84.7235	TRUE		0.248888		TRUE	3	11	Amp		N	Y	N
49	E1	FALSE	A	ABI3	UNKNOWN	SYBR	None				1.56207	1.18117	2.0658	30.2948	30.247	0.15364		-4.0477	0.251557	0.145237	-0.643457	86.6637	TRUE		0.909383		TRUE	3	23	Amp		N	N	N
50	E2	FALSE	A	AP1B1	UNKNOWN	SYBR	None				1.49536	1.12303	1.99114	28.4956	28.3203	0.163513		-5.9744	0.257705	0.148786	-0.580496	83.007	TRUE		0.973362		TRUE	3	22	Amp		N	N	N
51	E3	FALSE	A	C3	UNKNOWN	SYBR	None				9.1287	7.28815	11.4341	26.0446	26.0258	0.0373407		-8.26884	0.202657	0.117004	-3.19041	86.0782	TRUE		1.01613		TRUE	3	17	Amp		N	N	N
52	E4	FALSE	A	CD53	UNKNOWN	SYBR	None				2.329	1.86209	2.91297	18.6334	18.6245	0.029525		-15.6702	0.201364	0.116257	-1.21971	84.8582	TRUE		1.54452		TRUE	3	10	Amp		N	N	N
54	E6	FALSE	A	GAL3ST4	UNKNOWN	SYBR	None							34.4966	34.2947	0.199187						88.3451	TRUE		1.46297		TRUE	3	26	Amp		N	N	N
55	E7	FALSE	A	PLEKHO2	UNKNOWN	SYBR	None				1.7462	1.15264	2.64543	25.4486	25.6677	0.316371		-8.62694	0.373853	0.215844	-0.80422	84.4071	TRUE		0.930512		TRUE	3	16	Amp		N	N	N
56	E8	FALSE	A	PLXDC2	UNKNOWN	SYBR	None				0.822844	0.614321	1.10215	25.4347	25.5422	0.171776		-8.75243	0.263026	0.151858	0.28131	84.102	TRUE		1.61306		TRUE	3	15	Amp		N	N	N
57	E9	FALSE	A	RIN3	UNKNOWN	SYBR	None				5.6732	3.71334	8.66744	22.0186	22.3932	0.325303		-11.9015	0.381441	0.220225	-2.50416	82.3477	TRUE		0.0448224		TRUE	3	17	Amp		N	Y	N
58	E10	FALSE	A	SCIN3	UNKNOWN	SYBR	None				2.23798	1.68341	2.97526	24.0311	24.1665	0.161262		-10.1282	0.256283	0.147965	-1.1622	80.9796	TRUE		0.413326		TRUE	3	17	Amp		N	N	N
59	E11	FALSE	A	SIGLEC10	UNKNOWN	SYBR	None				3.23974	2.58524	4.05993	24.9105	24.8688	0.0397162		-9.42586	0.203108	0.117265	-1.69588	83.35	TRUE		0.921973		TRUE	3	19	Amp		N	N	N
60	E12	FALSE	A	SLA	UNKNOWN	SYBR	None				9.59142	6.95682	13.2238	17.243	17.0404	0.20944		-17.2542	0.289034	0.166874	-3.26174	84.5709	TRUE		0.248888		TRUE	3	13	Amp		N	Y	N
61	F1	FALSE	A	ABI3	UNKNOWN	SYBR	None				1.56207	1.18117	2.0658	30.371	30.247	0.15364		-4.0477	0.251557	0.145237	-0.643457	86.6637	TRUE		0.909383		TRUE	3	25	Amp		N	N	N
62	F2	FALSE	A	AP1B1	UNKNOWN	SYBR	None				1.49536	1.12303	1.99114	28.2934	28.3203	0.163513		-5.9744	0.257705	0.148786	-0.580496	83.007	TRUE		0.973362		TRUE	3	19	Amp		N	N	N
63	F3	FALSE	A	C3	UNKNOWN	SYBR	None				9.1287	7.28815	11.4341	26.05	26.0258	0.0373407		-8.26884	0.202657	0.117004	-3.19041	86.0782	TRUE		1.01613		TRUE	3	18	Amp		N	N	N
64	F4	FALSE	A	CD53	UNKNOWN	SYBR	None				2.329	1.86209	2.91297	18.5915	18.6245	0.029525		-15.6702	0.201364	0.116257	-1.21971	84.7057	TRUE		1.54452		TRUE	3	10	Amp		N	N	N
66	F6	FALSE	A	GAL3ST4	UNKNOWN	SYBR	None							34.0984	34.2947	0.199187						88.3451	TRUE		1.46297		TRUE	3	24	Amp		N	N	N
67	F7	FALSE	A	PLEKHO2	UNKNOWN	SYBR	None				1.7462	1.15264	2.64543	25.5242	25.6677	0.316371		-8.62694	0.373853	0.215844	-0.80422	84.4071	TRUE		0.930512		TRUE	3	18	Amp		N	N	N
68	F8	FALSE	A	PLXDC2	UNKNOWN	SYBR	None				0.822844	0.614321	1.10215	25.4517	25.5422	0.171776		-8.75243	0.263026	0.151858	0.28131	84.102	TRUE		1.61306		TRUE	3	17	Amp		N	N	N
69	F9	FALSE	A	RIN3	UNKNOWN	SYBR	None				5.6732	3.71334	8.66744	22.6046	22.3932	0.325303		-11.9015	0.381441	0.220225	-2.50416	82.4998	TRUE		0.0448224		TRUE	3	20	Amp		N	Y	N
70	F10	FALSE	A	SCIN3	UNKNOWN	SYBR	None				2.23798	1.68341	2.97526	24.3449	24.1665	0.161262		-10.1282	0.256283	0.147965	-1.1622	80.9796	TRUE		0.413326		TRUE	3	17	Amp		N	N	N
71	F11	FALSE	A	SIGLEC10	UNKNOWN	SYBR	None				3.23974	2.58524	4.05993	24.8314	24.8688	0.0397162		-9.42586	0.203108	0.117265	-1.69588	83.35	TRUE		0.921973		TRUE	3	17	Amp		N	N	N
72	F12	FALSE	A	SLA	UNKNOWN	SYBR	None				9.59142	6.95682	13.2238	17.0535	17.0404	0.20944		-17.2542	0.289034	0.166874	-3.26174	84.7235	TRUE		0.248888		TRUE	3	13	Amp		N	Y	N
73	G1	FALSE	D	SLC37A2	UNKNOWN	SYBR	None				1	0.829781	1.20514	24.6791	24.7129	0.0336484		-8.04492	0.167935	0.0969574	0	84.683	TRUE		1.25774		TRUE	3	17	Amp		N	N	N
74	G2	FALSE	D	SLC37A2	UNKNOWN	SYBR	None				1	0.829781	1.20514	24.7464	24.7129	0.0336484		-8.04492	0.167935	0.0969574	0	84.683	TRUE		1.25774		TRUE	3	16	Amp		N	N	N
75	G3	FALSE	D	SLC37A2	UNKNOWN	SYBR	None				1	0.829781	1.20514	24.7133	24.7129	0.0336484		-8.04492	0.167935	0.0969574	0	84.8582	TRUE		1.25774		TRUE	3	17	Amp		N	N	N
76	G4	FALSE	D	TERM2	UNKNOWN	SYBR	None				1	0.830692	1.20382	26.9919	27.0235	0.0283131		-5.73432	0.166948	0.0963875	0	87.9082	TRUE		2.01546		TRUE	3	19	Amp		N	N	N
77	G5	FALSE	D	TERM2	UNKNOWN	SYBR	None				1	0.830692	1.20382	27.0465	27.0235	0.0283131		-5.73432	0.166948	0.0963875	0	88.1927	TRUE		2.01546		TRUE	3	18	Amp		N	N	N
78	G6	FALSE	D	TERM2	UNKNOWN	SYBR	None				1	0.830692	1.20382	27.0323	27.0235	0.0283131		-5.73432	0.166948	0.0963875	0	88.0403	TRUE		2.01546		TRUE	3	17	Amp		N	N	N
79	G7	FALSE	D	GAPDH	UNKNOWN	SYBR	None				1	0.819711	1.21994	14.399	14.48	0.0703125		-18.2779	0.178924	0.103302	0	84.5596	TRUE		0.836285		TRUE	3	7	Amp		N	N	N
80	G8	FALSE	D	GAPDH	UNKNOWN	SYBR	None				1	0.819711	1.21994	14.5149	14.48	0.0703125		-18.2779	0.178924	0.103302	0	84.4071	TRUE		0.836285		TRUE	3	8	Amp		N	N	N
81	G9	FALSE	D	GAPDH	UNKNOWN	SYBR	None				1	0.819711	1.21994	14.526	14.48	0.0703125		-18.2779	0.178924	0.103302	0	84.6281	TRUE		0.836285		TRUE	3	8	Amp		N	N	N
85	H1	FALSE	A	SLC37A2	UNKNOWN	SYBR	None				0.180071	0.140534	0.23073	28.8389	28.7231	0.100512		-5.57156	0.223111	0.128813	2.47337	84.683	TRUE		1.25774		TRUE	3	22	Amp		N	N	N
86	H2	FALSE	A	SLC37A2	UNKNOWN	SYBR	None				0.180071	0.140534	0.23073	28.6578	28.7231	0.100512		-5.57156	0.223111	0.128813	2.47337	84.8354	TRUE		1.25774		TRUE	3	21	Amp		N	N	N
87	H3	FALSE	A	SLC37A2	UNKNOWN	SYBR	None				0.180071	0.140534	0.23073	28.6727	28.7231	0.100512		-5.57156	0.223111	0.128813	2.47337	85.0107	TRUE		1.25774		TRUE	3	21	Amp		N	N	N
88	H4	FALSE	A	TERM2	UNKNOWN	SYBR	None				1.52098	1.19816	1.93077	27.8975	27.9554	0.0801538		-6.33932	0.21471	0.123963	-0.604998	88.0607	TRUE		2.01546		TRUE	3	18	Amp		N	N	N
89	H5	FALSE	A	TERM2	UNKNOWN	SYBR	None				1.52098	1.19816	1.93077	27.9217	27.9554	0.0801538		-6.33932	0.21471	0.123963	-0.604998	88.1927	TRUE		2.01546		TRUE	3	18	Amp		N	N	N
90	H6	FALSE	A	TERM2	UNKNOWN	SYBR	None				1.52098	1.19816	1.93077	28.0468	27.9554	0.0801538		-6.33932	0.21471	0.123963	-0.604998	88.1927	TRUE		2.01546		TRUE	3	18	Amp		N	N	N
91	H7	FALSE	A	GAPDH	UNKNOWN	SYBR	None				2.92224	2.0073	4.2542	14.1682	14.4697	0.273077		-19.825	0.338004	0.195147	-1.54707	84.7122	TRUE		0.836285		TRUE	3	8	Amp		N	N	N
92	H8	FALSE	A	GAPDH	UNKNOWN	SYBR	None				2.92224	2.0073	4.2542	14.5407	14.4697	0.273077		-19.825	0.338004	0.195147	-1.54707	84.102	TRUE		0.836285		TRUE	3	7	Amp		N	N	N
93	H9	FALSE	A	GAPDH	UNKNOWN	SYBR	None				2.92224	2.0073	4.2542	14.7003	14.4697	0.273077		-19.825	0.338004	0.195147	-1.54707	84.324	TRUE		0.836285		TRUE	3	9	Amp		N	N	N
Well	Well Position	Omit	Sample Name	Target Name	Task	Reporter	Quencher	Quantity	Quantity Mean	Quantity SD	RQ	RQ Min	RQ Max	CT	Ct Mean	Ct SD	Delta Ct	Delta Ct Mean	Delta Ct SD	Delta Ct SE	Delta Delta Ct	Tm1	Automatic Ct Threshold	Tm2	Ct Threshold	Tm3	Automatic Baseline	Baseline Start	Baseline End	Amp Status	Comments	NOAMP	THOLDFAIL	MTP	CQCONF	EXPFAIL	Tm4
1	A1	FALSE	T	ABI3	UNKNOWN	SYBR	None				1	0.645774	1.54853	29.1539	29.0627	0.102464		-5.26153	0.393578	0.227232	0	86.9232	TRUE		0.592839		TRUE	3	22	Amp		N	N	N	N	N
2	A2	FALSE	T	AP1B1	UNKNOWN	SYBR	None				1	0.646931	1.54576	28.7225	28.776	0.0960901		-5.54825	0.391967	0.226302	0	83.1419	TRUE		0.905724		TRUE	3	22	Amp		N	N	N	N	N
3	A3	FALSE	T	C3	UNKNOWN	SYBR	None				1	0.65513	1.52642	25.9113	25.9365	0.0218386		-8.38769	0.380633	0.219759	0	86.1788	TRUE		0.969116		TRUE	3	17	Amp		N	N	N	N	N
4	A4	FALSE	T	CD53	UNKNOWN	SYBR	None				1	0.650009	1.53844	19.5103	19.4392	0.0768287		-14.8851	0.387695	0.223836	0	84.8169	TRUE		1.86676		TRUE	3	10	Amp		N	N	N	N	N
6	A6	FALSE	T	GAL3ST4	UNKNOWN	SYBR	None							34.0347	34.3242	0.380006						88.5905	TRUE		1.25036		TRUE	3	26	Amp		N	N	N	N	N
7	A7	FALSE	T	PLEKHO2	UNKNOWN	SYBR	None				1	0.654955	1.52682	25.5647	25.5728	0.0256773		-8.75139	0.380873	0.219897	0	84.5182	TRUE		1.03725		TRUE	3	18	Amp		N	N	N	N	N
8	A8	FALSE	T	PLXDC2	UNKNOWN	SYBR	None				1	0.619597	1.61395	26.2804	26.4628	0.202984		-7.86141	0.430821	0.248735	0	84.3669	TRUE		1.8051		TRUE	3	17	Amp		N	N	N	N	N
9	A9	FALSE	T	RIN3	UNKNOWN	SYBR	None				1	0.63468	1.5756	24.2956	24.3247	0.151718		-9.99949	0.409174	0.236237	0	82.6566	TRUE		0.0593712		TRUE	3	22	Amp		N	N	N	Y	N
10	A10	FALSE	T	SCIN3	UNKNOWN	SYBR	None				1	0.653611	1.52996	23.7749	23.7875	0.0455089		-10.5367	0.382721	0.220964	0	81.1462	TRUE		0.311339		TRUE	3	18	Amp		N	N	N	N	N
11	A11	FALSE	T	SIGLEC10	UNKNOWN	SYBR	None				1	0.65425	1.52847	25.369	25.3579	0.0373984		-8.96638	0.381842	0.220457	0	83.6174	TRUE		0.844487		TRUE	3	16	Amp		N	N	N	N	N
12	A12	FALSE	T	SLA	UNKNOWN	SYBR	None				1	0.62441	1.60151	18.8086	18.8607	0.18775		-15.4635	0.423857	0.244714	0	84.98	TRUE		0.120679		TRUE	3	15	Amp		N	N	N	Y	N
13	B1	FALSE	T	ABI3	UNKNOWN	SYBR	None				1	0.645774	1.54853	28.9518	29.0627	0.102464		-5.26153	0.393578	0.227232	0	86.772	TRUE		0.592839		TRUE	3	21	Amp		N	N	N	N	N
14	B2	FALSE	T	AP1B1	UNKNOWN	SYBR	None				1	0.646931	1.54576	28.7185	28.776	0.0960901		-5.54825	0.391967	0.226302	0	83.1419	TRUE		0.905724		TRUE	3	20	Amp		N	N	N	N	N
15	B3	FALSE	T	C3	UNKNOWN	SYBR	None				1	0.65513	1.52642	25.9497	25.9365	0.0218386		-8.38769	0.380633	0.219759	0	86.0275	TRUE		0.969116		TRUE	3	17	Amp		N	N	N	N	N
16	B4	FALSE	T	CD53	UNKNOWN	SYBR	None				1	0.650009	1.53844	19.3577	19.4392	0.0768287		-14.8851	0.387695	0.223836	0	84.8169	TRUE		1.86676		TRUE	3	10	Amp		N	N	N	N	N
18	B6	FALSE	T	GAL3ST4	UNKNOWN	SYBR	None							34.1834	34.3242	0.380006						88.4392	TRUE		1.25036		TRUE	3	26	Amp		N	N	N	N	N
19	B7	FALSE	T	PLEKHO2	UNKNOWN	SYBR	None				1	0.654955	1.52682	25.6016	25.5728	0.0256773		-8.75139	0.380873	0.219897	0	84.5182	TRUE		1.03725		TRUE	3	17	Amp		N	N	N	N	N
20	B8	FALSE	T	PLXDC2	UNKNOWN	SYBR	None				1	0.619597	1.61395	26.4266	26.4628	0.202984		-7.86141	0.430821	0.248735	0	84.3669	TRUE		1.8051		TRUE	3	17	Amp		N	N	N	N	N
21	B9	FALSE	T	RIN3	UNKNOWN	SYBR	None				1	0.63468	1.5756	24.1897	24.3247	0.151718		-9.99949	0.409174	0.236237	0	82.6566	TRUE		0.0593712		TRUE	3	20	Amp		N	N	N	Y	N
22	B10	FALSE	T	SCIN3	UNKNOWN	SYBR	None				1	0.653611	1.52996	23.838	23.7875	0.0455089		-10.5367	0.382721	0.220964	0	81.1462	TRUE		0.311339		TRUE	3	18	Amp		N	N	N	N	N
23	B11	FALSE	T	SIGLEC10	UNKNOWN	SYBR	None				1	0.65425	1.52847	25.3884	25.3579	0.0373984		-8.96638	0.381842	0.220457	0	83.6174	TRUE		0.844487		TRUE	3	16	Amp		N	N	N	N	N
24	B12	FALSE	T	SLA	UNKNOWN	SYBR	None				1	0.62441	1.60151	19.069	18.8607	0.18775		-15.4635	0.423857	0.244714	0	84.8286	TRUE		0.120679		TRUE	3	16	Amp		N	N	N	Y	N
25	C1	FALSE	T	ABI3	UNKNOWN	SYBR	None				1	0.645774	1.54853	29.0824	29.0627	0.102464		-5.26153	0.393578	0.227232	0	86.772	TRUE		0.592839		TRUE	3	23	Amp		N	N	N	N	N
26	C2	FALSE	T	AP1B1	UNKNOWN	SYBR	None				1	0.646931	1.54576	28.8869	28.776	0.0960901		-5.54825	0.391967	0.226302	0	83.1419	TRUE		0.905724		TRUE	3	21	Amp		N	N	N	N	N
27	C3	FALSE	T	C3	UNKNOWN	SYBR	None				1	0.65513	1.52642	25.9486	25.9365	0.0218386		-8.38769	0.380633	0.219759	0	86.0275	TRUE		0.969116		TRUE	3	18	Amp		N	N	N	N	N
28	C4	FALSE	T	CD53	UNKNOWN	SYBR	None				1	0.650009	1.53844	19.4494	19.4392	0.0768287		-14.8851	0.387695	0.223836	0	84.8169	TRUE		1.86676		TRUE	3	10	Amp		N	N	N	N	N
30	C6	FALSE	T	GAL3ST4	UNKNOWN	SYBR	None							34.7545	34.3242	0.380006						88.4392	TRUE		1.25036		TRUE	3	25	Amp		N	N	N	N	N
31	C7	FALSE	T	PLEKHO2	UNKNOWN	SYBR	None				1	0.654955	1.52682	25.5522	25.5728	0.0256773		-8.75139	0.380873	0.219897	0	84.5182	TRUE		1.03725		TRUE	3	17	Amp		N	N	N	N	N
32	C8	FALSE	T	PLXDC2	UNKNOWN	SYBR	None				1	0.619597	1.61395	26.6815	26.4628	0.202984		-7.86141	0.430821	0.248735	0	84.2156	TRUE		1.8051		TRUE	3	17	Amp		N	N	N	N	N
33	C9	FALSE	T	RIN3	UNKNOWN	SYBR	None				1	0.63468	1.5756	24.4889	24.3247	0.151718		-9.99949	0.409174	0.236237	0	82.5055	TRUE		0.0593712		TRUE	3	20	Amp		N	N	N	Y	N
34	C10	FALSE	T	SCIN3	UNKNOWN	SYBR	None				1	0.653611	1.52996	23.7496	23.7875	0.0455089		-10.5367	0.382721	0.220964	0	80.9951	TRUE		0.311339		TRUE	3	17	Amp		N	N	N	N	N
35	C11	FALSE	T	SIGLEC10	UNKNOWN	SYBR	None				1	0.65425	1.52847	25.3161	25.3579	0.0373984		-8.96638	0.381842	0.220457	0	83.466	TRUE		0.844487		TRUE	3	18	Amp		N	N	N	N	N
36	C12	FALSE	T	SLA	UNKNOWN	SYBR	None				1	0.62441	1.60151	18.7046	18.8607	0.18775		-15.4635	0.423857	0.244714	0	84.8286	TRUE		0.120679		TRUE	3	13	Amp		N	N	N	Y	N
37	D1	FALSE	U	ABI3	UNKNOWN	SYBR	None				1.36193	1.07907	1.71893	28.0379	28.1641	0.116057		-5.70718	0.209524	0.120969	-0.445649	86.6207	TRUE		0.592839		TRUE	3	21	Amp		N	N	N	N	N
38	D2	FALSE	U	AP1B1	UNKNOWN	SYBR	None				1.01817	0.766398	1.35267	28.115	28.2971	0.1869		-5.57423	0.255661	0.147606	-0.0259851	82.9907	TRUE		0.905724		TRUE	3	21	Amp		N	N	N	N	N
39	D3	FALSE	U	C3	UNKNOWN	SYBR	None				1.48993	1.19698	1.85457	24.8038	24.9084	0.0916057		-8.96293	0.197035	0.113758	-0.575243	86.0275	TRUE		0.969116		TRUE	3	15	Amp		N	N	N	N	N
40	D4	FALSE	U	CD53	UNKNOWN	SYBR	None				0.87857	0.69712	1.10725	19.107	19.173	0.11366		-14.6983	0.208206	0.120208	0.186771	84.8169	TRUE		1.86676		TRUE	3	9	Amp		N	N	N	N	N
42	D6	FALSE	U	GAL3ST4	UNKNOWN	SYBR	None							33.8547	33.8713	0.174445						88.288	TRUE		1.25036		TRUE	3	24	Amp		N	N	N	N	N
43	D7	FALSE	U	PLEKHO2	UNKNOWN	SYBR	None				0.644541	0.430039	0.966034	26.1155	25.7536	0.319701		-8.11773	0.364198	0.21027	0.633657	84.5182	TRUE		1.03725		TRUE	3	17	Amp		N	N	N	N	N
44	D8	FALSE	U	PLXDC2	UNKNOWN	SYBR	None				1.13522	0.913636	1.41056	25.9281	25.8269	0.0881232		-8.04439	0.19544	0.112837	-0.182977	84.2156	TRUE		1.8051		TRUE	3	16	Amp		N	N	N	N	N
45	D9	FALSE	U	RIN3	UNKNOWN	SYBR	None				0.832037	0.524553	1.31976	24.4228	24.1371	0.376776		-9.73421	0.4152	0.239716	0.265281	82.5055	TRUE		0.0593712		TRUE	3	21	Amp		N	N	N	Y	N
46	D10	FALSE	U	SCIN3	UNKNOWN	SYBR	None				0.855876	0.690827	1.06036	23.5382	23.5591	0.0821354		-10.3122	0.192814	0.111321	0.224526	81.1462	TRUE		0.311339		TRUE	3	17	Amp		N	N	N	N	N
47	D11	FALSE	U	SIGLEC10	UNKNOWN	SYBR	None				0.837046	0.687208	1.01956	25.1917	25.1616	0.0329007		-8.70976	0.17752	0.102491	0.25662	83.466	TRUE		0.844487		TRUE	3	18	Amp		N	N	N	N	N
48	D12	FALSE	U	SLA	UNKNOWN	SYBR	None				1.26362	0.900852	1.77246	18.3319	18.0703	0.249646		-15.8011	0.304555	0.175835	-0.337559	84.8286	TRUE		0.120679		TRUE	3	15	Amp		N	N	N	Y	N
49	E1	FALSE	U	ABI3	UNKNOWN	SYBR	None				1.36193	1.07907	1.71893	28.1881	28.1641	0.116057		-5.70718	0.209524	0.120969	-0.445649	86.6207	TRUE		0.592839		TRUE	3	20	Amp		N	N	N	N	N
50	E2	FALSE	U	AP1B1	UNKNOWN	SYBR	None				1.01817	0.766398	1.35267	28.4884	28.2971	0.1869		-5.57423	0.255661	0.147606	-0.0259851	82.9907	TRUE		0.905724		TRUE	3	20	Amp		N	N	N	N	N
51	E3	FALSE	U	C3	UNKNOWN	SYBR	None				1.48993	1.19698	1.85457	24.9746	24.9084	0.0916057		-8.96293	0.197035	0.113758	-0.575243	86.0275	TRUE		0.969116		TRUE	3	17	Amp		N	N	N	N	N
52	E4	FALSE	U	CD53	UNKNOWN	SYBR	None				0.87857	0.69712	1.10725	19.3042	19.173	0.11366		-14.6983	0.208206	0.120208	0.186771	84.8169	TRUE		1.86676		TRUE	3	10	Amp		N	N	N	N	N
54	E6	FALSE	U	GAL3ST4	UNKNOWN	SYBR	None							34.0535	33.8713	0.174445						88.288	TRUE		1.25036		TRUE	3	26	Amp		N	N	N	N	N
55	E7	FALSE	U	PLEKHO2	UNKNOWN	SYBR	None				0.644541	0.430039	0.966034	25.5095	25.7536	0.319701		-8.11773	0.364198	0.21027	0.633657	84.3669	TRUE		1.03725		TRUE	3	18	Amp		N	N	N	N	N
56	E8	FALSE	U	PLXDC2	UNKNOWN	SYBR	None				1.13522	0.913636	1.41056	25.7672	25.8269	0.0881232		-8.04439	0.19544	0.112837	-0.182977	84.2156	TRUE		1.8051		TRUE	3	16	Amp		N	N	N	N	N
57	E9	FALSE	U	RIN3	UNKNOWN	SYBR	None				0.832037	0.524553	1.31976	24.2783	24.1371	0.376776		-9.73421	0.4152	0.239716	0.265281	82.5055	TRUE		0.0593712		TRUE	3	21	Amp		N	N	N	Y	N
58	E10	FALSE	U	SCIN3	UNKNOWN	SYBR	None				0.855876	0.690827	1.06036	23.4894	23.5591	0.0821354		-10.3122	0.192814	0.111321	0.224526	80.9951	TRUE		0.311339		TRUE	3	18	Amp		N	N	N	N	N
59	E11	FALSE	U	SIGLEC10	UNKNOWN	SYBR	None				0.837046	0.687208	1.01956	25.1666	25.1616	0.0329007		-8.70976	0.17752	0.102491	0.25662	83.466	TRUE		0.844487		TRUE	3	17	Amp		N	N	N	N	N
60	E12	FALSE	U	SLA	UNKNOWN	SYBR	None				1.26362	0.900852	1.77246	18.0443	18.0703	0.249646		-15.8011	0.304555	0.175835	-0.337559	84.6772	TRUE		0.120679		TRUE	3	15	Amp		N	N	N	Y	N
61	F1	FALSE	U	ABI3	UNKNOWN	SYBR	None				1.36193	1.07907	1.71893	28.2663	28.1641	0.116057		-5.70718	0.209524	0.120969	-0.445649	86.6207	TRUE		0.592839		TRUE	3	21	Amp		N	N	N	N	N
62	F2	FALSE	U	AP1B1	UNKNOWN	SYBR	None				1.01817	0.766398	1.35267	28.2878	28.2971	0.1869		-5.57423	0.255661	0.147606	-0.0259851	82.9907	TRUE		0.905724		TRUE	3	21	Amp		N	N	N	N	N
63	F3	FALSE	U	C3	UNKNOWN	SYBR	None				1.48993	1.19698	1.85457	24.9467	24.9084	0.0916057		-8.96293	0.197035	0.113758	-0.575243	86.0275	TRUE		0.969116		TRUE	3	18	Amp		N	N	N	N	N
64	F4	FALSE	U	CD53	UNKNOWN	SYBR	None				0.87857	0.69712	1.10725	19.1077	19.173	0.11366		-14.6983	0.208206	0.120208	0.186771	84.8169	TRUE		1.86676		TRUE	3	10	Amp		N	N	N	N	N
66	F6	FALSE	U	GAL3ST4	UNKNOWN	SYBR	None							33.7057	33.8713	0.174445						88.4392	TRUE		1.25036		TRUE	3	26	Amp		N	N	N	N	N
67	F7	FALSE	U	PLEKHO2	UNKNOWN	SYBR	None				0.644541	0.430039	0.966034	25.6357	25.7536	0.319701		-8.11773	0.364198	0.21027	0.633657	84.3669	TRUE		1.03725		TRUE	3	18	Amp		N	N	N	N	N
68	F8	FALSE	U	PLXDC2	UNKNOWN	SYBR	None				1.13522	0.913636	1.41056	25.7854	25.8269	0.0881232		-8.04439	0.19544	0.112837	-0.182977	84.2156	TRUE		1.8051		TRUE	3	17	Amp		N	N	N	N	N
69	F9	FALSE	U	RIN3	UNKNOWN	SYBR	None				0.832037	0.524553	1.31976	23.7101	24.1371	0.376776		-9.73421	0.4152	0.239716	0.265281	82.5055	TRUE		0.0593712		TRUE	3	20	Amp		N	N	N	Y	N
70	F10	FALSE	U	SCIN3	UNKNOWN	SYBR	None				0.855876	0.690827	1.06036	23.6497	23.5591	0.0821354		-10.3122	0.192814	0.111321	0.224526	80.9951	TRUE		0.311339		TRUE	3	18	Amp		N	N	N	N	N
71	F11	FALSE	U	SIGLEC10	UNKNOWN	SYBR	None				0.837046	0.687208	1.01956	25.1264	25.1616	0.0329007		-8.70976	0.17752	0.102491	0.25662	83.466	TRUE		0.844487		TRUE	3	19	Amp		N	N	N	N	N
72	F12	FALSE	U	SLA	UNKNOWN	SYBR	None				1.26362	0.900852	1.77246	17.8346	18.0703	0.249646		-15.8011	0.304555	0.175835	-0.337559	84.6772	TRUE		0.120679		TRUE	3	13	Amp		N	N	N	Y	N
73	G1	FALSE	T	SLC37A2	UNKNOWN	SYBR	None				1	0.649348	1.54001	29.0713	29.0598	0.0813253		-5.26447	0.388611	0.224365	0	84.6545	TRUE		1.29426		TRUE	3	21	Amp		N	N	N	N	N
74	G2	FALSE	T	SLC37A2	UNKNOWN	SYBR	None				1	0.649348	1.54001	28.9733	29.0598	0.0813253		-5.26447	0.388611	0.224365	0	84.8057	TRUE		1.29426		TRUE	3	20	Amp		N	N	N	N	N
75	G3	FALSE	T	SLC37A2	UNKNOWN	SYBR	None				1	0.649348	1.54001	29.1347	29.0598	0.0813253		-5.26447	0.388611	0.224365	0	84.8169	TRUE		1.29426		TRUE	3	21	Amp		N	N	N	N	N
76	G4	FALSE	T	TERM2	UNKNOWN	SYBR	None				1	0.65151	1.53489	28.2433	28.3189	0.0655533		-6.00536	0.385619	0.222637	0	87.9946	TRUE		1.75879		TRUE	3	19	Amp		N	N	N	N	N
77	G5	FALSE	T	TERM2	UNKNOWN	SYBR	None				1	0.65151	1.53489	28.3533	28.3189	0.0655533		-6.00536	0.385619	0.222637	0	88.1367	TRUE		1.75879		TRUE	3	19	Amp		N	N	N	N	N
78	G6	FALSE	T	TERM2	UNKNOWN	SYBR	None				1	0.65151	1.53489	28.36	28.3189	0.0655533		-6.00536	0.385619	0.222637	0	88.1367	TRUE		1.75879		TRUE	3	19	Amp		N	N	N	N	N
79	G7	FALSE	T	GAPDH	UNKNOWN	SYBR	None				1	0.64656	1.54665	14.8999	14.7866	0.0981765		-19.5376	0.392484	0.2266	0	84.6696	TRUE		0.732611		TRUE	3	8	Amp		N	N	N	N	N
80	G8	FALSE	T	GAPDH	UNKNOWN	SYBR	None				1	0.64656	1.54665	14.7281	14.7866	0.0981765		-19.5376	0.392484	0.2266	0	84.8209	TRUE		0.732611		TRUE	3	9	Amp		N	N	N	N	N
81	G9	FALSE	T	GAPDH	UNKNOWN	SYBR	None				1	0.64656	1.54665	14.7318	14.7866	0.0981765		-19.5376	0.392484	0.2266	0	84.9222	TRUE		0.732611		TRUE	3	7	Amp		N	N	N	N	N
85	H1	FALSE	U	SLC37A2	UNKNOWN	SYBR	None				0.80067	0.60873	1.05313	29.1255	28.9276	0.174397		-4.94375	0.246668	0.142414	0.320721	84.6545	TRUE		1.29426		TRUE	3	21	Amp		N	N	N	N	N
86	H2	FALSE	U	SLC37A2	UNKNOWN	SYBR	None				0.80067	0.60873	1.05313	28.7967	28.9276	0.174397		-4.94375	0.246668	0.142414	0.320721	84.8057	TRUE		1.29426		TRUE	3	21	Amp		N	N	N	N	N
87	H3	FALSE	U	SLC37A2	UNKNOWN	SYBR	None				0.80067	0.60873	1.05313	28.8605	28.9276	0.174397		-4.94375	0.246668	0.142414	0.320721	84.9682	TRUE		1.29426		TRUE	3	21	Amp		N	N	N	N	N
88	H4	FALSE	U	TERM2	UNKNOWN	SYBR	None				0.797285	0.655886	0.969167	28.1686	28.1928	0.0209967		-5.67853	0.175704	0.101443	0.326832	88.1459	TRUE		1.75879		TRUE	3	19	Amp		N	N	N	N	N
89	H5	FALSE	U	TERM2	UNKNOWN	SYBR	None				0.797285	0.655886	0.969167	28.2033	28.1928	0.0209967		-5.67853	0.175704	0.101443	0.326832	88.1367	TRUE		1.75879		TRUE	3	19	Amp		N	N	N	N	N
90	H6	FALSE	U	TERM2	UNKNOWN	SYBR	None				0.797285	0.655886	0.969167	28.2065	28.1928	0.0209967		-5.67853	0.175704	0.101443	0.326832	88.288	TRUE		1.75879		TRUE	3	19	Amp		N	N	N	N	N
91	H7	FALSE	U	GAPDH	UNKNOWN	SYBR	None				0.653967	0.535958	0.79796	14.9	14.9464	0.0405808		-18.9249	0.179103	0.103405	0.61271	84.8209	TRUE		0.732611		TRUE	3	9	Amp		N	N	N	N	N
92	H8	FALSE	U	GAPDH	UNKNOWN	SYBR	None				0.653967	0.535958	0.79796	14.9636	14.9464	0.0405808		-18.9249	0.179103	0.103405	0.61271	84.8209	TRUE		0.732611		TRUE	3	9	Amp		N	N	N	N	N
93	H9	FALSE	U	GAPDH	UNKNOWN	SYBR	None				0.653967	0.535958	0.79796	14.9755	14.9464	0.0405808		-18.9249	0.179103	0.103405	0.61271	84.9222	TRUE		0.732611		TRUE	3	8	Amp		N	N	N	N	N
