# Supplementary material for: Interrogation of macrophage-related prognostic signatures reveals a potential immune-mediated therapy strategy by histone deacetylase inhibition in glioma
Source: Front Oncol. 2025 Jun 6;15:1554845. doi: 10.3389/fonc.2025.1554845 (PMC12179195; doi:10.3389/fonc.2025.1554845)
Supplement: Supplementary file 17 [file Table4.xlsx]

## Sheet: Sheet1
Well	Well Position	Omit	Sample Name	Target Name	Task	Reporter	Quencher	Quantity	Quantity Mean	Quantity SD	RQ	RQ Min	RQ Max	CT	Ct Mean	Ct SD	Delta Ct	Delta Ct Mean	Delta Ct SD	Delta Ct SE	Delta Delta Ct	Tm1	Automatic Ct Threshold	Tm2	Ct Threshold	Tm3	Automatic Baseline	Baseline Start	Baseline End	Amp Status	Comments	HIGHSD	MTP	CQCONF	Tm4
61	F1	FALSE	D	GAPDH	UNKNOWN	SYBR	None				1	0.221888	4.50678	14.6491	15.0181	0.328125		-5.24842	4.34136	1.03778	0	83.9706	TRUE		0.716329		TRUE	3	8	Amp		N	N	N
62	F2	FALSE	D	GAPDH	UNKNOWN	SYBR	None				1	0.221888	4.50678	15.1278	15.0181	0.328125		-5.24842	4.34136	1.03778	0	83.9706	TRUE		0.716329		TRUE	3	8	Amp		N	N	N
63	F3	FALSE	D	GAPDH	UNKNOWN	SYBR	None				1	0.221888	4.50678	15.2773	15.0181	0.328125		-5.24842	4.34136	1.03778	0	84.132	TRUE		0.716329		TRUE	3	9	Amp		N	N	N
64	F4	FALSE	A	GAPDH	UNKNOWN	SYBR	None				1.26541	0.280147	5.7158	14.4221	14.2752	0.133621		-5.58803	4.39938	1.03933	-0.339604	84.132	TRUE		0.716329		TRUE	3	9	Amp		N	N	N
65	F5	FALSE	A	GAPDH	UNKNOWN	SYBR	None				1.26541	0.280147	5.7158	14.2426	14.2752	0.133621		-5.58803	4.39938	1.03933	-0.339604	84.4243	TRUE		0.716329		TRUE	3	8	Amp		N	N	N
66	F6	FALSE	A	GAPDH	UNKNOWN	SYBR	None				1.26541	0.280147	5.7158	14.161	14.2752	0.133621		-5.58803	4.39938	1.03933	-0.339604	84.4243	TRUE		0.716329		TRUE	3	9	Amp		N	N	N
67	F7	FALSE	T	GAPDH	UNKNOWN	SYBR	None				0.57343	0.130758	2.51473	14.5873	14.9124	0.286256		-4.44611	4.27545	1.01896	0.80231	84.2867	TRUE		0.716329		TRUE	3	9	Amp		N	N	N
68	F8	FALSE	T	GAPDH	UNKNOWN	SYBR	None				0.57343	0.130758	2.51473	15.1265	14.9124	0.286256		-4.44611	4.27545	1.01896	0.80231	84.4366	TRUE		0.716329		TRUE	3	8	Amp		N	N	N
69	F9	FALSE	T	GAPDH	UNKNOWN	SYBR	None				0.57343	0.130758	2.51473	15.0234	14.9124	0.286256		-4.44611	4.27545	1.01896	0.80231	84.5455	TRUE		0.716329		TRUE	3	8	Amp		N	N	N
70	F10	FALSE	U	GAPDH	UNKNOWN	SYBR	None				0.326256	0.083624	1.27288	14.3989	15.0112	0.530466		-3.6325	3.80033	0.938364	1.61592	84.6952	TRUE		0.716329		TRUE	3	8	Amp		Y	N	N
71	F11	FALSE	U	GAPDH	UNKNOWN	SYBR	None				0.326256	0.083624	1.27288	15.3027	15.0112	0.530466		-3.6325	3.80033	0.938364	1.61592	84.4454	TRUE		0.716329		TRUE	3	9	Amp		Y	N	N
72	F12	FALSE	U	GAPDH	UNKNOWN	SYBR	None				0.326256	0.083624	1.27288	15.332	15.0112	0.530466		-3.6325	3.80033	0.938364	1.61592	84.5953	TRUE		0.716329		TRUE	3	10	Amp		Y	N	N
85	H1	FALSE	D	CYBB	UNKNOWN	SYBR	None				1	0.225267	4.43917	25.9081	26.0499	0.207664		5.78345	4.33392	1.02736	0	84.5699	TRUE	80.0755	0.235357		TRUE	3	21	Amp		N	Y	N
86	H2	FALSE	D	CYBB	UNKNOWN	SYBR	None				1	0.225267	4.43917	25.9534	26.0499	0.207664		5.78345	4.33392	1.02736	0	84.5699	TRUE	79.9257	0.235357		TRUE	3	19	Amp		N	Y	N
87	H3	FALSE	D	CYBB	UNKNOWN	SYBR	None				1	0.225267	4.43917	26.2883	26.0499	0.207664		5.78345	4.33392	1.02736	0	84.8814	TRUE	80.235	0.235357		TRUE	3	21	Amp		N	Y	N
88	H4	FALSE	A	CYBB	UNKNOWN	SYBR	None				1.08812	0.241388	4.90502	25.4928	25.5249	0.0954803		5.66161	4.39839	1.03793	-0.121843	84.7316	TRUE	80.0851	0.235357		TRUE	3	20	Amp		N	Y	N
89	H5	FALSE	A	CYBB	UNKNOWN	SYBR	None				1.08812	0.241388	4.90502	25.4495	25.5249	0.0954803		5.66161	4.39839	1.03793	-0.121843	84.8738	TRUE	80.3786	0.235357		TRUE	3	19	Amp		N	Y	N
90	H6	FALSE	A	CYBB	UNKNOWN	SYBR	None				1.08812	0.241388	4.90502	25.6323	25.5249	0.0954803		5.66161	4.39839	1.03793	-0.121843	84.8738	TRUE	80.3786	0.235357		TRUE	3	21	Amp		N	Y	N
91	H7	FALSE	T	CYBB	UNKNOWN	SYBR	None				0.250003	0.0579201	1.0791	27.0615	27.1419	0.124088		7.78343	4.26766	1.00802	1.99998	84.7364	TRUE	80.0891	0.235357		TRUE	3	21	Amp		N	Y	N
92	H8	FALSE	T	CYBB	UNKNOWN	SYBR	None				0.250003	0.0579201	1.0791	27.2848	27.1419	0.124088		7.78343	4.26766	1.00802	1.99998	84.7364	TRUE	80.3889	0.235357		TRUE	3	22	Amp		N	Y	N
93	H9	FALSE	T	CYBB	UNKNOWN	SYBR	None				0.250003	0.0579201	1.0791	27.0795	27.1419	0.124088		7.78343	4.26766	1.00802	1.99998	84.9945	TRUE	80.5046	0.235357		TRUE	3	18	Amp		N	Y	N
94	H10	FALSE	U	CYBB	UNKNOWN	SYBR	None				0.228171	0.0625437	0.832413	26.7241	26.559	0.165317		7.91526	3.76675	0.892098	2.13181	84.9945	TRUE	80.6542	0.235357		TRUE	3	22	Amp		N	Y	N
95	H11	FALSE	U	CYBB	UNKNOWN	SYBR	None				0.228171	0.0625437	0.832413	26.3935	26.559	0.165317		7.91526	3.76675	0.892098	2.13181	84.8953	TRUE	80.0963	0.235357		TRUE	3	21	Amp		N	Y	N
96	H12	FALSE	U	CYBB	UNKNOWN	SYBR	None				0.228171	0.0625437	0.832413	26.5593	26.559	0.165317		7.91526	3.76675	0.892098	2.13181	84.8953	TRUE	80.2463	0.235357		TRUE	3	21	Amp		N	Y	N
Well	Well Position	Omit	Sample Name	Target Name	Task	Reporter	Quencher	Quantity	Quantity Mean	Quantity SD	RQ	RQ Min	RQ Max	CT	Ct Mean	Ct SD	Delta Ct	Delta Ct Mean	Delta Ct SD	Delta Ct SE	Delta Delta Ct	Tm1	Automatic Ct Threshold	Tm2	Ct Threshold	Tm3	Automatic Baseline	Baseline Start	Baseline End	Amp Status	Comments	HIGHSD	MTP	CQCONF	Tm4
58	E10	FALSE	D	GAPDH	UNKNOWN	SYBR	None				0.505596	0.0365703	6.99002	15.5701	15.4194	0.197589		-7.16511	6.06631	1.75398	0.983943	84.3573	TRUE		1.01064		TRUE	3	9	Amp		N	N	N
59	E11	FALSE	D	GAPDH	UNKNOWN	SYBR	None				0.505596	0.0365703	6.99002	15.4923	15.4194	0.197589		-7.16511	6.06631	1.75398	0.983943	84.3909	TRUE		1.01064		TRUE	3	8	Amp		N	N	N
60	E12	FALSE	D	GAPDH	UNKNOWN	SYBR	None				0.505596	0.0365703	6.99002	15.1957	15.4194	0.197589		-7.16511	6.06631	1.75398	0.983943	84.5396	TRUE		1.01064		TRUE	3	8	Amp		N	N	N
52	E4	FALSE	A	GAPDH	UNKNOWN	SYBR	None				0.994143	0.0527428	18.7385	14.8066	14.9963	0.165441		-8.14058	6.78693	1.96096	0.00847427	84.3823	TRUE		1.01064		TRUE	3	8	Amp		N	N	N
53	E5	FALSE	A	GAPDH	UNKNOWN	SYBR	None				0.994143	0.0527428	18.7385	15.111	14.9963	0.165441		-8.14058	6.78693	1.96096	0.00847427	84.3745	TRUE		1.01064		TRUE	3	8	Amp		N	N	N
54	E6	FALSE	A	GAPDH	UNKNOWN	SYBR	None				0.994143	0.0527428	18.7385	15.0712	14.9963	0.165441		-8.14058	6.78693	1.96096	0.00847427	84.3745	TRUE		1.01064		TRUE	3	9	Amp		N	N	N
55	E7	FALSE	T	GAPDH	UNKNOWN	SYBR	None				0.763145	0.0498776	11.6764	15.4444	15.5824	0.142983		-7.75908	6.30561	1.82168	0.389971	84.3862	TRUE		1.01064		TRUE	3	9	Amp		N	N	N
56	E8	FALSE	T	GAPDH	UNKNOWN	SYBR	None				0.763145	0.0498776	11.6764	15.7299	15.5824	0.142983		-7.75908	6.30561	1.82168	0.389971	84.3862	TRUE		1.01064		TRUE	3	9	Amp		N	N	N
57	E9	FALSE	T	GAPDH	UNKNOWN	SYBR	None				0.763145	0.0498776	11.6764	15.573	15.5824	0.142983		-7.75908	6.30561	1.82168	0.389971	84.3573	TRUE		1.01064		TRUE	3	8	Amp		N	N	N
49	E1	FALSE	U	GAPDH	UNKNOWN	SYBR	None				1	0.0683976	14.6204	15.4826	15.6094	0.121967		-8.14905	6.20171	1.79132	0	84.2257	TRUE		1.01064		TRUE	3	10	Amp		N	N	N
50	E2	FALSE	U	GAPDH	UNKNOWN	SYBR	None				1	0.0683976	14.6204	15.6199	15.6094	0.121967		-8.14905	6.20171	1.79132	0	84.2257	TRUE		1.01064		TRUE	3	10	Amp		N	N	N
51	E3	FALSE	U	GAPDH	UNKNOWN	SYBR	None				1	0.0683976	14.6204	15.7258	15.6094	0.121967		-8.14905	6.20171	1.79132	0	84.3823	TRUE		1.01064		TRUE	3	9	Amp		N	N	N
82	G10	FALSE	D	CD163	UNKNOWN	SYBR	None				0.180007	0.0130823	2.47682	23.7033	23.7332	0.0746102		1.14868	6.06355	1.75079	2.47387	82.2781	TRUE		0.108744		TRUE	3	19	Amp		N	N	Y
83	G11	FALSE	D	CD163	UNKNOWN	SYBR	None				0.180007	0.0130823	2.47682	23.8181	23.7332	0.0746102		1.14868	6.06355	1.75079	2.47387	82.3088	TRUE		0.108744		TRUE	3	19	Amp		N	N	Y
84	G12	FALSE	D	CD163	UNKNOWN	SYBR	None				0.180007	0.0130823	2.47682	23.6781	23.7332	0.0746102		1.14868	6.06355	1.75079	2.47387	82.3088	TRUE		0.108744		TRUE	3	19	Amp		N	N	Y
76	G4	FALSE	A	CD163	UNKNOWN	SYBR	None				0.551571	0.0292728	10.393	22.4953	22.67	0.157173		-0.466815	6.78674	1.96074	0.85838	82.3009	TRUE		0.108744		TRUE	3	18	Amp		N	N	Y
77	G5	FALSE	A	CD163	UNKNOWN	SYBR	None				0.551571	0.0292728	10.393	22.7998	22.67	0.157173		-0.466815	6.78674	1.96074	0.85838	82.2938	TRUE		0.108744		TRUE	3	18	Amp		N	N	Y
78	G6	FALSE	A	CD163	UNKNOWN	SYBR	None				0.551571	0.0292728	10.393	22.715	22.67	0.157173		-0.466815	6.78674	1.96074	0.85838	82.2938	TRUE		0.108744		TRUE	3	19	Amp		N	N	Y
79	G7	FALSE	T	CD163	UNKNOWN	SYBR	None				0.7191	0.0470474	10.9911	22.56	22.4921	0.113692		-0.849459	6.30501	1.82099	0.475736	82.1558	TRUE		0.108744		TRUE	3	19	Amp		N	N	Y
80	G8	FALSE	T	CD163	UNKNOWN	SYBR	None				0.7191	0.0470474	10.9911	22.5554	22.4921	0.113692		-0.849459	6.30501	1.82099	0.475736	82.3045	TRUE		0.108744		TRUE	3	19	Amp		N	N	Y
81	G9	FALSE	T	CD163	UNKNOWN	SYBR	None				0.7191	0.0470474	10.9911	22.3608	22.4921	0.113692		-0.849459	6.30501	1.82099	0.475736	82.2781	TRUE		0.108744		TRUE	3	18	Amp		N	N	Y
73	G1	FALSE	U	CD163	UNKNOWN	SYBR	None				1	0.068012	14.7033	22.6677	22.4333	0.235596		-1.3252	6.20499	1.7951	0	82.1451	TRUE		0.108744		TRUE	3	19	Amp		N	N	Y
74	G2	FALSE	U	CD163	UNKNOWN	SYBR	None				1	0.068012	14.7033	22.4356	22.4333	0.235596		-1.3252	6.20499	1.7951	0	82.1451	TRUE		0.108744		TRUE	3	18	Amp		N	N	Y
75	G3	FALSE	U	CD163	UNKNOWN	SYBR	None				1	0.068012	14.7033	22.1965	22.4333	0.235596		-1.3252	6.20499	1.7951	0	82.3009	TRUE		0.108744		TRUE	3	18	Amp		N	N	Y
