# Supplementary material for: Interrogation of macrophage-related prognostic signatures reveals a potential immune-mediated therapy strategy by histone deacetylase inhibition in glioma
Source: Front Oncol. 2025 Jun 6;15:1554845. doi: 10.3389/fonc.2025.1554845 (PMC12179195; doi:10.3389/fonc.2025.1554845)
Supplement: Supplementary file 18 [file Table5.xlsx]

## Sheet: Sheet1
Well	Well Position	Omit	Sample Name	Target Name	Task	Reporter	Quencher	Quantity	Quantity Mean	Quantity SD	RQ	RQ Min	RQ Max	CT	Ct Mean	Ct SD	Delta Ct	Delta Ct Mean	Delta Ct SD	Delta Ct SE	Delta Delta Ct	Tm1	Automatic Ct Threshold	Tm2	Ct Threshold	Tm3	Automatic Baseline	Baseline Start	Baseline End	Amp Status	Comments	HIGHSD	MTP	CQCONF	EXPFAIL	Tm4
1	A1	FALSE	RAW264.7	Abi3	UNKNOWN	SYBR	None							27.5608	27.4782	0.0860714						85.9481	TRUE		1.35541		TRUE	3	21	Amp		N	N	N	N
13	B1	FALSE	RAW264.7	Abi3	UNKNOWN	SYBR	None							27.3891	27.4782	0.0860714						85.9481	TRUE		1.35541		TRUE	3	19	Amp		N	N	N	N
25	C1	FALSE	RAW264.7	Abi3	UNKNOWN	SYBR	None							27.4847	27.4782	0.0860714						85.7981	TRUE		1.35541		TRUE	3	20	Amp		N	N	N	N
2	A2	FALSE	RAW264.7+GL261 GCM	Abi3	UNKNOWN	SYBR	None							26.8606	26.9926	0.114297						85.9481	TRUE		1.35541		TRUE	3	19	Amp		N	N	N	N
14	B2	FALSE	RAW264.7+GL261 GCM	Abi3	UNKNOWN	SYBR	None							27.059	26.9926	0.114297						85.7981	TRUE		1.35541		TRUE	3	18	Amp		N	N	N	N
26	C2	FALSE	RAW264.7+GL261 GCM	Abi3	UNKNOWN	SYBR	None							27.0582	26.9926	0.114297						85.7981	TRUE		1.35541		TRUE	3	20	Amp		N	N	N	N
4	A4	FALSE	RAW264.7+GL261 GCM+Vorinostat	Abi3	UNKNOWN	SYBR	None							32.3454	32.2217	0.112108						86.2593	TRUE		1.35541		TRUE	3	24	Amp		N	N	N	N
16	B4	FALSE	RAW264.7+GL261 GCM+Vorinostat	Abi3	UNKNOWN	SYBR	None							32.1269	32.2217	0.112108						86.1093	TRUE		1.35541		TRUE	3	23	Amp		N	N	N	N
28	C4	FALSE	RAW264.7+GL261 GCM+Vorinostat	Abi3	UNKNOWN	SYBR	None							32.1927	32.2217	0.112108						85.9592	TRUE		1.35541		TRUE	3	24	Amp		N	N	N	N
5	A5	FALSE	RAW264.7	Ap1b1	UNKNOWN	SYBR	None				0.557985	0.505505	0.615913	22.553	22.5541	0.0222374		-4.92415	0.0888977	0.0513251	0.841702	85.9508	TRUE		1.06333		TRUE	3	16	Amp		N	N	N	N
17	B5	FALSE	RAW264.7	Ap1b1	UNKNOWN	SYBR	None				0.557985	0.505505	0.615913	22.5768	22.5541	0.0222374		-4.92415	0.0888977	0.0513251	0.841702	85.9508	TRUE		1.06333		TRUE	3	16	Amp		N	N	N	N
29	C5	FALSE	RAW264.7	Ap1b1	UNKNOWN	SYBR	None				0.557985	0.505505	0.615913	22.5323	22.5541	0.0222374		-4.92415	0.0888977	0.0513251	0.841702	85.8008	TRUE		1.06333		TRUE	3	16	Amp		N	N	N	N
6	A6	FALSE	RAW264.7+GL261 GCM	Ap1b1	UNKNOWN	SYBR	None				0.140143	0.112724	0.174231	23.9657	24.0618	0.159162		-2.93083	0.19595	0.113132	2.83503	85.9508	TRUE		1.06333		TRUE	3	18	Amp		N	N	N	N
18	B6	FALSE	RAW264.7+GL261 GCM	Ap1b1	UNKNOWN	SYBR	None				0.140143	0.112724	0.174231	23.9741	24.0618	0.159162		-2.93083	0.19595	0.113132	2.83503	85.8008	TRUE		1.06333		TRUE	3	15	Amp		N	N	N	N
30	C6	FALSE	RAW264.7+GL261 GCM	Ap1b1	UNKNOWN	SYBR	None				0.140143	0.112724	0.174231	24.2455	24.0618	0.159162		-2.93083	0.19595	0.113132	2.83503	85.6508	TRUE		1.06333		TRUE	3	16	Amp		N	N	N	N
8	A8	FALSE	RAW264.7+GL261 GCM+Vorinostat	Ap1b1	UNKNOWN	SYBR	None				2.60053	2.24544	3.01178	25.0017	25.077	0.069941		-7.14466	0.132136	0.0762888	-1.37881	85.8125	TRUE		1.06333		TRUE	3	17	Amp		N	N	N	N
20	B8	FALSE	RAW264.7+GL261 GCM+Vorinostat	Ap1b1	UNKNOWN	SYBR	None				2.60053	2.24544	3.01178	25.0895	25.077	0.069941		-7.14466	0.132136	0.0762888	-1.37881	85.8125	TRUE		1.06333		TRUE	3	18	Amp		N	N	N	N
32	C8	FALSE	RAW264.7+GL261 GCM+Vorinostat	Ap1b1	UNKNOWN	SYBR	None				2.60053	2.24544	3.01178	25.1399	25.077	0.069941		-7.14466	0.132136	0.0762888	-1.37881	85.6624	TRUE		1.06333		TRUE	3	17	Amp		N	N	N	N
9	A9	FALSE	RAW264.7	C3	UNKNOWN	SYBR	None				0.0649209	0.0521409	0.0808333	28.5669	28.3887	0.177535		0.910482	0.197299	0.113911	3.94517	83.5188	TRUE		1.26796		TRUE	3	21	Amp		N	N	N	N
21	B9	FALSE	RAW264.7	C3	UNKNOWN	SYBR	None				0.0649209	0.0521409	0.0808333	28.3874	28.3887	0.177535		0.910482	0.197299	0.113911	3.94517	83.369	TRUE		1.26796		TRUE	3	19	Amp		N	N	N	N
33	C9	FALSE	RAW264.7	C3	UNKNOWN	SYBR	None				0.0649209	0.0521409	0.0808333	28.2118	28.3887	0.177535		0.910482	0.197299	0.113911	3.94517	83.2192	TRUE		1.26796		TRUE	3	21	Amp		N	N	N	N
10	A10	FALSE	RAW264.7+GL261 GCM	C3	UNKNOWN	SYBR	None				0.0608797	0.0509877	0.0726908	27.9239	27.9958	0.111371		1.0032	0.159585	0.0921365	4.0379	83.5188	TRUE		1.26796		TRUE	3	19	Amp		N	N	N	N
22	B10	FALSE	RAW264.7+GL261 GCM	C3	UNKNOWN	SYBR	None				0.0608797	0.0509877	0.0726908	28.1241	27.9958	0.111371		1.0032	0.159585	0.0921365	4.0379	83.369	TRUE		1.26796		TRUE	3	19	Amp		N	N	N	N
34	C10	FALSE	RAW264.7+GL261 GCM	C3	UNKNOWN	SYBR	None				0.0608797	0.0509877	0.0726908	27.9394	27.9958	0.111371		1.0032	0.159585	0.0921365	4.0379	83.2192	TRUE		1.26796		TRUE	3	21	Amp		N	N	N	N
12	A12	FALSE	RAW264.7+GL261 GCM+Vorinostat	C3	UNKNOWN	SYBR	None				5.65534	4.63396	6.90183	26.5421	26.6874	0.139892		-5.5343	0.17927	0.103502	-2.49961	83.4176	TRUE		1.26796		TRUE	3	19	Amp		N	N	N	N
24	B12	FALSE	RAW264.7+GL261 GCM+Vorinostat	C3	UNKNOWN	SYBR	None				5.65534	4.63396	6.90183	26.6988	26.6874	0.139892		-5.5343	0.17927	0.103502	-2.49961	83.4176	TRUE		1.26796		TRUE	3	20	Amp		N	N	N	N
36	C12	FALSE	RAW264.7+GL261 GCM+Vorinostat	C3	UNKNOWN	SYBR	None				5.65534	4.63396	6.90183	26.8212	26.6874	0.139892		-5.5343	0.17927	0.103502	-2.49961	83.2675	TRUE		1.26796		TRUE	3	19	Amp		N	N	N	N
37	D1	FALSE	RAW264.7	Cd53	UNKNOWN	SYBR	None				1.40497	1.21933	1.61888	19.6886	19.7965	0.0941251		-7.68169	0.127545	0.0736384	-0.490541	79.4989	TRUE		1.00327		TRUE	3	13	Amp		N	N	N	N
49	E1	FALSE	RAW264.7	Cd53	UNKNOWN	SYBR	None				1.40497	1.21933	1.61888	19.8394	19.7965	0.0941251		-7.68169	0.127545	0.0736384	-0.490541	79.4989	TRUE		1.00327		TRUE	3	13	Amp		N	N	N	N
61	F1	FALSE	RAW264.7	Cd53	UNKNOWN	SYBR	None				1.40497	1.21933	1.61888	19.8615	19.7965	0.0941251		-7.68169	0.127545	0.0736384	-0.490541	79.4989	TRUE		1.00327		TRUE	3	13	Amp		N	N	N	N
38	D2	FALSE	RAW264.7+GL261 GCM	Cd53	UNKNOWN	SYBR	None				1.70403	1.35182	2.14799	18.9014	19.0325	0.174246		-7.96009	0.208388	0.120313	-0.768948	79.4989	TRUE		1.00327		TRUE	3	11	Amp		N	N	N	N
50	E2	FALSE	RAW264.7+GL261 GCM	Cd53	UNKNOWN	SYBR	None				1.70403	1.35182	2.14799	19.2302	19.0325	0.174246		-7.96009	0.208388	0.120313	-0.768948	79.4989	TRUE		1.00327		TRUE	3	12	Amp		N	N	N	N
62	F2	FALSE	RAW264.7+GL261 GCM	Cd53	UNKNOWN	SYBR	None				1.70403	1.35182	2.14799	18.9658	19.0325	0.174246		-7.96009	0.208388	0.120313	-0.768948	79.4989	TRUE		1.00327		TRUE	3	13	Amp		N	N	N	N
40	D4	FALSE	RAW264.7+GL261 GCM+Vorinostat	Cd53	UNKNOWN	SYBR	None				0.235547	0.20258	0.273879	27.1956	27.1164	0.0764598		-5.10523	0.135699	0.078346	2.08591	79.8073	TRUE		1.00327		TRUE	3	21	Amp		N	N	N	N
52	E4	FALSE	RAW264.7+GL261 GCM+Vorinostat	Cd53	UNKNOWN	SYBR	None				0.235547	0.20258	0.273879	27.1108	27.1164	0.0764598		-5.10523	0.135699	0.078346	2.08591	79.8073	TRUE		1.00327		TRUE	3	20	Amp		N	N	N	N
64	F4	FALSE	RAW264.7+GL261 GCM+Vorinostat	Cd53	UNKNOWN	SYBR	None				0.235547	0.20258	0.273879	27.043	27.1164	0.0764598		-5.10523	0.135699	0.078346	2.08591	79.6573	TRUE		1.00327		TRUE	3	19	Amp		N	N	N	N
41	D5	FALSE	RAW264.7	Cybb	UNKNOWN	SYBR	None				14.3977	12.9779	15.9728	20.9923	21.0235	0.0363699		-6.45471	0.0934402	0.0539477	-3.84776	81.7509	TRUE		0.861032		TRUE	3	13	Amp		N	N	N	N
53	E5	FALSE	RAW264.7	Cybb	UNKNOWN	SYBR	None				14.3977	12.9779	15.9728	21.0148	21.0235	0.0363699		-6.45471	0.0934402	0.0539477	-3.84776	81.7509	TRUE		0.861032		TRUE	3	14	Amp		N	N	N	N
65	F5	FALSE	RAW264.7	Cybb	UNKNOWN	SYBR	None				14.3977	12.9779	15.9728	21.0634	21.0235	0.0363699		-6.45471	0.0934402	0.0539477	-3.84776	81.7509	TRUE		0.861032		TRUE	3	14	Amp		N	N	N	N
42	D6	FALSE	RAW264.7+GL261 GCM	Cybb	UNKNOWN	SYBR	None				12.2727	10.7259	14.0425	20.804	20.7682	0.0404569		-6.22433	0.121246	0.0700015	-3.61738	81.7509	TRUE		0.861032		TRUE	3	14	Amp		N	N	N	N
54	E6	FALSE	RAW264.7+GL261 GCM	Cybb	UNKNOWN	SYBR	None				12.2727	10.7259	14.0425	20.7243	20.7682	0.0404569		-6.22433	0.121246	0.0700015	-3.61738	81.7509	TRUE		0.861032		TRUE	3	14	Amp		N	N	N	N
66	F6	FALSE	RAW264.7+GL261 GCM	Cybb	UNKNOWN	SYBR	None				12.2727	10.7259	14.0425	20.7764	20.7682	0.0404569		-6.22433	0.121246	0.0700015	-3.61738	81.9009	TRUE		0.861032		TRUE	3	13	Amp		N	N	N	N
44	D8	FALSE	RAW264.7+GL261 GCM+Vorinostat	Cybb	UNKNOWN	SYBR	None				0.0128425	0.00319388	0.0516393	36.1384	35.8977	1.24735		3.67598	1.25238	0.723062	6.28293	82.0608	TRUE		0.861032		TRUE	3	28	Amp		Y	N	N	N
56	E8	FALSE	RAW264.7+GL261 GCM+Vorinostat	Cybb	UNKNOWN	SYBR	None				0.0128425	0.00319388	0.0516393	37.0071	35.8977	1.24735		3.67598	1.25238	0.723062	6.28293	82.0608	TRUE		0.861032		TRUE	3	30	Amp		Y	N	N	N
68	F8	FALSE	RAW264.7+GL261 GCM+Vorinostat	Cybb	UNKNOWN	SYBR	None				0.0128425	0.00319388	0.0516393	34.5475	35.8977	1.24735		3.67598	1.25238	0.723062	6.28293	81.9108	TRUE		0.861032		TRUE	3	28	Amp		Y	N	N	N
45	D9	FALSE	RAW264.7	Gal3st4	UNKNOWN	SYBR	None							37.5843	37.4483	0.132597						92.8059	TRUE	85.3163	0.965797		TRUE	3	44	Amp		N	Y	Y	Y
57	E9	FALSE	RAW264.7	Gal3st4	UNKNOWN	SYBR	None							37.2685	37.4483	0.132597						84.4175	TRUE		0.965797		TRUE	3	38	Amp		N	N	Y	N
69	F9	FALSE	RAW264.7	Gal3st4	UNKNOWN	SYBR	None				0.0474726			37.4922	37.4483	0.132597					4.39676	81.1221	TRUE		0.965797		TRUE	3	29	Amp		N	N	N	N
46	D10	FALSE	RAW264.7+GL261 GCM	Gal3st4	UNKNOWN	SYBR	None				0.0917821	0.0783897	0.107463	36.0685	36.0598	0.023303		9.06292	0.120746	0.0715014	3.44564	84.4175	TRUE	94.0042	0.965797		TRUE	3	19	Amp		N	Y	Y	N
58	E10	FALSE	RAW264.7+GL261 GCM	Gal3st4	UNKNOWN	SYBR	None				0.0917821	0.0783897	0.107463	36.028	36.0598	0.023303		9.06292	0.120746	0.0715014	3.44564	80.9723	TRUE		0.965797		TRUE	3	29	Amp		N	N	N	N
70	F10	FALSE	RAW264.7+GL261 GCM	Gal3st4	UNKNOWN	SYBR	None				0.0917821	0.0783897	0.107463	36.083	36.0598	0.023303		9.06292	0.120746	0.0715014	3.44564	80.9723	TRUE		0.965797		TRUE	3	29	Amp		N	N	N	N
48	D12	FALSE	RAW264.7+GL261 GCM+Vorinostat	Gal3st4	UNKNOWN	SYBR	None				2.87113	2.0329	4.05499	36.1748	36.3165	0.116355		4.09566	0.230607	0.156509	-1.52162	81.016	TRUE		0.965797		TRUE	3	29	Amp		N	N	N	N
60	E12	FALSE	RAW264.7+GL261 GCM+Vorinostat	Gal3st4	UNKNOWN	SYBR	None				2.87113	2.0329	4.05499	36.3149	36.3165	0.116355		4.09566	0.230607	0.156509	-1.52162	91.9734	TRUE	79.665	0.965797	88.6712	TRUE	3	44	Amp		N	Y	Y	Y
72	F12	FALSE	RAW264.7+GL261 GCM+Vorinostat	Gal3st4	UNKNOWN	SYBR	None				2.87113	2.0329	4.05499	36.4598	36.3165	0.116355		4.09566	0.230607	0.156509	-1.52162	81.1661	TRUE		0.965797		TRUE	3	29	Amp		N	N	N	N
81	G9	FALSE	RAW264.7	Gapdh	UNKNOWN	SYBR	None				95.9617			13.0913	13.2929	0.191338		-29.0855			-6.58439	85.5944	TRUE		0.600585		TRUE	3	7	Amp		N	N	N
89	H5	FALSE	RAW264.7	Gapdh	UNKNOWN	SYBR	None				95.9617			13.3152	13.2929	0.191338		-29.0855			-6.58439	85.4887	TRUE		0.600585		TRUE	3	7	Amp		N	N	N
93	H9	FALSE	RAW264.7	Gapdh	UNKNOWN	SYBR	None				95.9617			13.4721	13.2929	0.191338		-29.0855			-6.58439	85.7441	TRUE		0.600585		TRUE	3	8	Amp		N	N	N
82	G10	FALSE	RAW264.7+GL261 GCM	Gapdh	UNKNOWN	SYBR	None							13.6243	13.6177	0.0524154						85.5944	TRUE		0.600585		TRUE	3	8	Amp		N	N	N
90	H6	FALSE	RAW264.7+GL261 GCM	Gapdh	UNKNOWN	SYBR	None							13.5623	13.6177	0.0524154						85.6386	TRUE		0.600585		TRUE	3	7	Amp		N	N	N
94	H10	FALSE	RAW264.7+GL261 GCM	Gapdh	UNKNOWN	SYBR	None							13.6665	13.6177	0.0524154						85.5944	TRUE		0.600585		TRUE	3	9	Amp		N	N	N
84	G12	FALSE	RAW264.7+GL261 GCM+Vorinostat	Gapdh	UNKNOWN	SYBR	None				0.793724			15.3621	15.3401	0.0678688		-22.1678			0.33329	85.5116	TRUE		0.600585		TRUE	3	10	Amp		N	N	N
92	H8	FALSE	RAW264.7+GL261 GCM+Vorinostat	Gapdh	UNKNOWN	SYBR	None				0.793724			15.264	15.3401	0.0678688		-22.1678			0.33329	85.5028	TRUE		0.600585		TRUE	3	9	Amp		N	N	N
96	H12	FALSE	RAW264.7+GL261 GCM+Vorinostat	Gapdh	UNKNOWN	SYBR	None				0.793724			15.3943	15.3401	0.0678688		-22.1678			0.33329	85.5116	TRUE		0.600585		TRUE	3	9	Amp		N	N	N
41	D5	FALSE	RAW264.7	Plekho2	UNKNOWN	SYBR	None				1504.29			20.9955	21.0304	0.0336698		-21.348			-10.5549	87.2878	TRUE		0.958231		TRUE	3	13	Amp		N	N	N
53	E5	FALSE	RAW264.7	Plekho2	UNKNOWN	SYBR	None				1504.29			21.0628	21.0304	0.0336698		-21.348			-10.5549	87.2878	TRUE		0.958231		TRUE	3	15	Amp		N	N	N
65	F5	FALSE	RAW264.7	Plekho2	UNKNOWN	SYBR	None				1504.29			21.0328	21.0304	0.0336698		-21.348			-10.5549	87.2878	TRUE		0.958231		TRUE	3	13	Amp		N	N	N
42	D6	FALSE	RAW264.7+GL261 GCM	Plekho2	UNKNOWN	SYBR	None							22.0954	22.048	0.0429573						87.2878	TRUE		0.958231		TRUE	3	15	Amp		N	N	N
54	E6	FALSE	RAW264.7+GL261 GCM	Plekho2	UNKNOWN	SYBR	None							22.0117	22.048	0.0429573						87.2878	TRUE		0.958231		TRUE	3	13	Amp		N	N	N
66	F6	FALSE	RAW264.7+GL261 GCM	Plekho2	UNKNOWN	SYBR	None							22.0368	22.048	0.0429573						87.2878	TRUE		0.958231		TRUE	3	16	Amp		N	N	N
44	D8	FALSE	RAW264.7+GL261 GCM+Vorinostat	Plekho2	UNKNOWN	SYBR	None				5.72606			24.2368	24.1973	0.0372118		-13.3107			-2.51754	87.3029	TRUE		0.958231		TRUE	3	17	Amp		N	N	N
56	E8	FALSE	RAW264.7+GL261 GCM+Vorinostat	Plekho2	UNKNOWN	SYBR	None				5.72606			24.163	24.1973	0.0372118		-13.3107			-2.51754	87.3029	TRUE		0.958231		TRUE	3	16	Amp		N	N	N
68	F8	FALSE	RAW264.7+GL261 GCM+Vorinostat	Plekho2	UNKNOWN	SYBR	None				5.72606			24.192	24.1973	0.0372118		-13.3107			-2.51754	87.3029	TRUE		0.958231		TRUE	3	17	Amp		N	N	N
48	D12	FALSE	RAW264.7+GL261 GCM+Vorinostat	Plxdc2	UNKNOWN	SYBR	None							37.5148	37.5367	0.240156						83.8609	TRUE		1.30284		TRUE	3	28	Amp		N	N	N
60	E12	FALSE	RAW264.7+GL261 GCM+Vorinostat	Plxdc2	UNKNOWN	SYBR	None							37.2542	37.5367	0.240156						90.4638	TRUE	84.011	1.30284		TRUE	3	31	Amp		Y	Y	N
72	F12	FALSE	RAW264.7+GL261 GCM+Vorinostat	Plxdc2	UNKNOWN	SYBR	None							37.8412	37.5367	0.240156						80.7095	TRUE	72.1558	1.30284	90.3137	TRUE	3	44	Amp		Y	Y	Y	75.7574
73	G1	FALSE	RAW264.7	Rin3	UNKNOWN	SYBR	None				0.728253	0.564745	0.939102	27.4246	27.6067	0.212046		0.128506	0.228849	0.132126	0.457488	87.4479	TRUE		1.69091		TRUE	3	19	Amp		N	N	N	N
77	G5	FALSE	RAW264.7	Rin3	UNKNOWN	SYBR	None				0.728253	0.564745	0.939102	27.556	27.6067	0.212046		0.128506	0.228849	0.132126	0.457488	87.7507	TRUE		1.69091		TRUE	3	17	Amp		N	N	N	N
85	H1	FALSE	RAW264.7	Rin3	UNKNOWN	SYBR	None				0.728253	0.564745	0.939102	27.8395	27.6067	0.212046		0.128506	0.228849	0.132126	0.457488	87.4479	TRUE		1.69091		TRUE	3	20	Amp		N	N	N	N
74	G2	FALSE	RAW264.7+GL261 GCM	Rin3	UNKNOWN	SYBR	None				0.58711	0.481776	0.715474	27.5798	27.4319	0.136405		0.439316	0.177961	0.102746	0.768298	87.4479	TRUE		1.69091		TRUE	3	18	Amp		N	N	N	N
78	G6	FALSE	RAW264.7+GL261 GCM	Rin3	UNKNOWN	SYBR	None				0.58711	0.481776	0.715474	27.4048	27.4319	0.136405		0.439316	0.177961	0.102746	0.768298	87.7507	TRUE		1.69091		TRUE	3	19	Amp		N	N	N	N
86	H2	FALSE	RAW264.7+GL261 GCM	Rin3	UNKNOWN	SYBR	None				0.58711	0.481776	0.715474	27.3111	27.4319	0.136405		0.439316	0.177961	0.102746	0.768298	87.4479	TRUE		1.69091		TRUE	3	20	Amp		N	N	N	N
76	G4	FALSE	RAW264.7+GL261 GCM+Vorinostat	Rin3	UNKNOWN	SYBR	None				0.277426	0.229856	0.33484	33.6964	33.7425	0.126852		1.52084	0.169291	0.0977404	1.84983	87.6097	TRUE		1.69091		TRUE	3	24	Amp		N	N	N	N
80	G8	FALSE	RAW264.7+GL261 GCM+Vorinostat	Rin3	UNKNOWN	SYBR	None				0.277426	0.229856	0.33484	33.6452	33.7425	0.126852		1.52084	0.169291	0.0977404	1.84983	87.7633	TRUE		1.69091		TRUE	3	24	Amp		N	N	N	N
88	H4	FALSE	RAW264.7+GL261 GCM+Vorinostat	Rin3	UNKNOWN	SYBR	None				0.277426	0.229856	0.33484	33.886	33.7425	0.126852		1.52084	0.169291	0.0977404	1.84983	87.7598	TRUE		1.69091		TRUE	3	26	Amp		N	N	N	N
81	G9	FALSE	RAW264.7	Scin	UNKNOWN	SYBR	None				0.125005	0.100832	0.154973	26.1502	26.2554	0.1732		-1.22283	0.193408	0.111664	2.99994	82.7698	TRUE		0.830228		TRUE	3	20	Amp		N	N	N	N
89	H5	FALSE	RAW264.7	Scin	UNKNOWN	SYBR	None				0.125005	0.100832	0.154973	26.1606	26.2554	0.1732		-1.22283	0.193408	0.111664	2.99994	82.8008	TRUE		0.830228		TRUE	3	19	Amp		N	N	N	N
93	H9	FALSE	RAW264.7	Scin	UNKNOWN	SYBR	None				0.125005	0.100832	0.154973	26.4553	26.2554	0.1732		-1.22283	0.193408	0.111664	2.99994	82.9196	TRUE		0.830228		TRUE	3	20	Amp		N	N	N	N
82	G10	FALSE	RAW264.7+GL261 GCM	Scin	UNKNOWN	SYBR	None				0.0627962	0.0546964	0.0720953	26.7934	26.763	0.0488191		-0.229593	0.124287	0.0717569	3.99318	82.7698	TRUE		0.830228		TRUE	3	19	Amp		N	N	N	N
90	H6	FALSE	RAW264.7+GL261 GCM	Scin	UNKNOWN	SYBR	None				0.0627962	0.0546964	0.0720953	26.7888	26.763	0.0488191		-0.229593	0.124287	0.0717569	3.99318	82.8008	TRUE		0.830228		TRUE	3	19	Amp		N	N	N	N
94	H10	FALSE	RAW264.7+GL261 GCM	Scin	UNKNOWN	SYBR	None				0.0627962	0.0546964	0.0720953	26.7067	26.763	0.0488191		-0.229593	0.124287	0.0717569	3.99318	82.7698	TRUE		0.830228		TRUE	3	20	Amp		N	N	N	N
84	G12	FALSE	RAW264.7+GL261 GCM+Vorinostat	Scin	UNKNOWN	SYBR	None				0.343456	0.146376	0.805881	29.2497	29.5407	0.759365		-2.68097	0.767596	0.443172	1.5418	82.8172	TRUE		0.830228		TRUE	3	23	Amp		Y	N	N	N
92	H8	FALSE	RAW264.7+GL261 GCM+Vorinostat	Scin	UNKNOWN	SYBR	None				0.343456	0.146376	0.805881	28.9699	29.5407	0.759365		-2.68097	0.767596	0.443172	1.5418	82.8111	TRUE		0.830228		TRUE	3	22	Amp		Y	N	N	N
96	H12	FALSE	RAW264.7+GL261 GCM+Vorinostat	Scin	UNKNOWN	SYBR	None				0.343456	0.146376	0.805881	30.4025	29.5407	0.759365		-2.68097	0.767596	0.443172	1.5418	82.2168	TRUE		0.830228		TRUE	3	22	Amp		Y	N	N	N
5	A5	FALSE	RAW264.7	Sla	UNKNOWN	SYBR	None				3257.02			23.869	23.857	0.0253356		-18.5214			-11.6693	83.5396	TRUE		0.656512		TRUE	3	18	Amp		N	N	N
17	B5	FALSE	RAW264.7	Sla	UNKNOWN	SYBR	None				3257.02			23.8741	23.857	0.0253356		-18.5214			-11.6693	83.3897	TRUE		0.656512		TRUE	3	17	Amp		N	N	N
29	C5	FALSE	RAW264.7	Sla	UNKNOWN	SYBR	None				3257.02			23.8279	23.857	0.0253356		-18.5214			-11.6693	83.2398	TRUE		0.656512		TRUE	3	16	Amp		N	N	N
6	A6	FALSE	RAW264.7+GL261 GCM	Sla	UNKNOWN	SYBR	None							23.0988	23.1419	0.0599416						83.5396	TRUE		0.656512		TRUE	3	14	Amp		N	N	N
18	B6	FALSE	RAW264.7+GL261 GCM	Sla	UNKNOWN	SYBR	None							23.1165	23.1419	0.0599416						83.3897	TRUE		0.656512		TRUE	3	17	Amp		N	N	N
30	C6	FALSE	RAW264.7+GL261 GCM	Sla	UNKNOWN	SYBR	None							23.2103	23.1419	0.0599416						83.2398	TRUE		0.656512		TRUE	3	16	Amp		N	N	N
8	A8	FALSE	RAW264.7+GL261 GCM+Vorinostat	Sla	UNKNOWN	SYBR	None				0.232675			32.7426	32.7595	0.0510526		-4.7484			2.10361	83.5527	TRUE		0.656512		TRUE	3	25	Amp		N	N	N
20	B8	FALSE	RAW264.7+GL261 GCM+Vorinostat	Sla	UNKNOWN	SYBR	None				0.232675			32.8169	32.7595	0.0510526		-4.7484			2.10361	83.4026	TRUE		0.656512		TRUE	3	26	Amp		N	N	N
32	C8	FALSE	RAW264.7+GL261 GCM+Vorinostat	Sla	UNKNOWN	SYBR	None				0.232675			32.7191	32.7595	0.0510526		-4.7484			2.10361	83.4026	TRUE		0.656512		TRUE	3	25	Amp		N	N	N
9	A9	FALSE	RAW264.7	Sla37a2	UNKNOWN	SYBR	None				610.403			22.9088	22.8225	0.108667		-19.5559			-9.25362	85.7441	TRUE		1.02611		TRUE	3	15	Amp		N	N	N
21	B9	FALSE	RAW264.7	Sla37a2	UNKNOWN	SYBR	None				610.403			22.8581	22.8225	0.108667		-19.5559			-9.25362	85.7441	TRUE		1.02611		TRUE	3	17	Amp		N	N	N
33	C9	FALSE	RAW264.7	Sla37a2	UNKNOWN	SYBR	None				610.403			22.7005	22.8225	0.108667		-19.5559			-9.25362	85.4447	TRUE		1.02611		TRUE	3	16	Amp		N	N	N
10	A10	FALSE	RAW264.7+GL261 GCM	Sla37a2	UNKNOWN	SYBR	None							22.6015	22.6439	0.135313						85.7441	TRUE		1.02611		TRUE	3	15	Amp		N	N	N
22	B10	FALSE	RAW264.7+GL261 GCM	Sla37a2	UNKNOWN	SYBR	None							22.7953	22.6439	0.135313						85.5944	TRUE		1.02611		TRUE	3	17	Amp		N	N	N
34	C10	FALSE	RAW264.7+GL261 GCM	Sla37a2	UNKNOWN	SYBR	None							22.5348	22.6439	0.135313						85.5944	TRUE		1.02611		TRUE	3	16	Amp		N	N	N
12	A12	FALSE	RAW264.7+GL261 GCM+Vorinostat	Sla37a2	UNKNOWN	SYBR	None				1.69012			26.2627	26.4485	0.229377		-11.0594			-0.757125	85.8117	TRUE		1.02611		TRUE	3	18	Amp		N	N	N
24	B12	FALSE	RAW264.7+GL261 GCM+Vorinostat	Sla37a2	UNKNOWN	SYBR	None				1.69012			26.378	26.4485	0.229377		-11.0594			-0.757125	85.6617	TRUE		1.02611		TRUE	3	18	Amp		N	N	N
36	C12	FALSE	RAW264.7+GL261 GCM+Vorinostat	Sla37a2	UNKNOWN	SYBR	None				1.69012			26.7049	26.4485	0.229377		-11.0594			-0.757125	85.5116	TRUE		1.02611		TRUE	3	20	Amp		N	N	N
37	D1	FALSE	RAW264.7	Trem2	UNKNOWN	SYBR	None				2397.95			19.8959	20.0089	0.100327		-22.3695			-11.2276	86.5324	TRUE		1.71371		TRUE	3	12	Amp		N	N	N
49	E1	FALSE	RAW264.7	Trem2	UNKNOWN	SYBR	None				2397.95			20.0877	20.0089	0.100327		-22.3695			-11.2276	86.5324	TRUE		1.71371		TRUE	3	13	Amp		N	N	N
61	F1	FALSE	RAW264.7	Trem2	UNKNOWN	SYBR	None				2397.95			20.043	20.0089	0.100327		-22.3695			-11.2276	86.5324	TRUE		1.71371		TRUE	3	12	Amp		N	N	N
38	D2	FALSE	RAW264.7+GL261 GCM	Trem2	UNKNOWN	SYBR	None							19.9604	20.124	0.232784						86.5324	TRUE		1.71371		TRUE	3	12	Amp		N	N	N
50	E2	FALSE	RAW264.7+GL261 GCM	Trem2	UNKNOWN	SYBR	None							20.3905	20.124	0.232784						86.5324	TRUE		1.71371		TRUE	3	13	Amp		N	N	N
62	F2	FALSE	RAW264.7+GL261 GCM	Trem2	UNKNOWN	SYBR	None							20.0212	20.124	0.232784						86.5324	TRUE		1.71371		TRUE	3	13	Amp		N	N	N
40	D4	FALSE	RAW264.7+GL261 GCM+Vorinostat	Trem2	UNKNOWN	SYBR	None				0.323851			28.0467	27.9926	0.0568381		-9.51531			1.6266	86.8502	TRUE		1.71371		TRUE	3	19	Amp		N	N	N
52	E4	FALSE	RAW264.7+GL261 GCM+Vorinostat	Trem2	UNKNOWN	SYBR	None				0.323851			27.9977	27.9926	0.0568381		-9.51531			1.6266	86.8502	TRUE		1.71371		TRUE	3	19	Amp		N	N	N
64	F4	FALSE	RAW264.7+GL261 GCM+Vorinostat	Trem2	UNKNOWN	SYBR	None				0.323851			27.9334	27.9926	0.0568381		-9.51531			1.6266	86.8502	TRUE		1.71371		TRUE	3	19	Amp		N	N	N
Well	Well Position	Omit	Sample Name	Target Name	Task	Reporter	Quencher	Quantity	Quantity Mean	Quantity SD	RQ	RQ Min	RQ Max	CT	Ct Mean	Ct SD	Delta Ct	Delta Ct Mean	Delta Ct SD	Delta Ct SE	Delta Delta Ct	Tm1	Automatic Ct Threshold	Tm2	Ct Threshold	Tm3	Automatic Baseline	Baseline Start	Baseline End	Amp Status	Comments	HIGHSD	MTP	CQCONF	EXPFAIL	Tm4
1	A1	FALSE	RAW264.7	Cd163	UNKNOWN	SYBR	None							36.1549	36.1705	0.27496						86.8256	TRUE	68.9936	0.0889176		TRUE	3	34	Amp		Y	Y	N	N
13	B1	FALSE	RAW264.7	Cd163	UNKNOWN	SYBR	None							36.5147	36.1705	0.27496						81.3388	TRUE	89.2641	0.0889176	76.4617	TRUE	3	19	Amp		N	Y	Y	N	93.684
25	C1	FALSE	RAW264.7	Cd163	UNKNOWN	SYBR	None							35.8418	36.1705	0.27496						84.8442	TRUE		0.0889176		TRUE	3	38	Amp		Y	N	Y	N
2	A2	FALSE	RAW264.7+GL261 GCM	Cd163	UNKNOWN	SYBR	None							23.4852	23.7185	0.191767						78.1382	TRUE	89.8738	0.0889176	86.2159	TRUE	3	44	Amp		N	Y	Y	Y	92.3123
14	B2	FALSE	RAW264.7+GL261 GCM	Cd163	UNKNOWN	SYBR	None							23.9549	23.7185	0.191767						60.0014	TRUE		0.0889176		TRUE	3	18	Amp		N	N	Y	N
26	C2	FALSE	RAW264.7+GL261 GCM	Cd163	UNKNOWN	SYBR	None							23.7156	23.7185	0.191767						89.1117	TRUE	75.5472	0.0889176	81.6436	TRUE	3	6	Amp		N	Y	Y	N	92.6171
4	A4	FALSE	RAW264.7+GL261 GCM+Vorinostat	Cd163	UNKNOWN	SYBR	None							32.0185	32.0405	0.0854008						60.0008	TRUE		0.0889176		TRUE	3	44	Amp		N	N	Y	Y
16	B4	FALSE	RAW264.7+GL261 GCM+Vorinostat	Cd163	UNKNOWN	SYBR	None							31.9486	32.0405	0.0854008						82.8801	TRUE		0.0889176		TRUE	3	29	Amp		N	N	Y	N
28	C4	FALSE	RAW264.7+GL261 GCM+Vorinostat	Cd163	UNKNOWN	SYBR	None							32.1543	32.0405	0.0854008						60.0008	TRUE		0.0889176		TRUE	3	44	Amp		N	N	Y	Y
73	G1	FALSE	RAW264.7	Gapdh	UNKNOWN	SYBR	None							16.5483	16.602	0.311659		-23.6307	2.68092	1.89143		85.1491	TRUE		0.615606		TRUE	3	11	Amp		N	N	N	N
77	G5	FALSE	RAW264.7	Gapdh	UNKNOWN	SYBR	None							16.3208	16.602	0.311659		-23.6307	2.68092	1.89143		85.3043	TRUE		0.615606		TRUE	3	11	Amp		N	N	N	N
85	H1	FALSE	RAW264.7	Gapdh	UNKNOWN	SYBR	None							16.9371	16.602	0.311659		-23.6307	2.68092	1.89143		85.1491	TRUE		0.615606		TRUE	3	11	Amp		N	N	N	N
74	G2	FALSE	RAW264.7+GL261 GCM	Gapdh	UNKNOWN	SYBR	None							17.9101	17.7669	0.12755		-5.94865				85.1491	TRUE		0.615606		TRUE	3	11	Amp		N	N	N	N
78	G6	FALSE	RAW264.7+GL261 GCM	Gapdh	UNKNOWN	SYBR	None							17.6655	17.7669	0.12755		-5.94865				85.3043	TRUE		0.615606		TRUE	3	12	Amp		N	N	N	N
86	H2	FALSE	RAW264.7+GL261 GCM	Gapdh	UNKNOWN	SYBR	None							17.7252	17.7669	0.12755		-5.94865				85.1491	TRUE		0.615606		TRUE	3	12	Amp		N	N	N	N
76	G4	FALSE	RAW264.7+GL261 GCM+Vorinostat	Gapdh	UNKNOWN	SYBR	None							22.7574	22.8084	0.0700081		-9.2256				85.168	TRUE		0.615606		TRUE	3	17	Amp		N	N	N	N
80	G8	FALSE	RAW264.7+GL261 GCM+Vorinostat	Gapdh	UNKNOWN	SYBR	None							22.8882	22.8084	0.0700081		-9.2256				85.1724	TRUE		0.615606		TRUE	3	16	Amp		N	N	N	N
88	H4	FALSE	RAW264.7+GL261 GCM+Vorinostat	Gapdh	UNKNOWN	SYBR	None							22.7796	22.8084	0.0700081		-9.2256				85.3205	TRUE		0.615606		TRUE	3	16	Amp		N	N	N	N
37	D1	FALSE	RAW264.7	Plxdc2	UNKNOWN	SYBR	None							35.2485	35.7383	0.398597						61.9827	TRUE		0.440018		TRUE	3	14	Amp		N	N	Y	N
49	E1	FALSE	RAW264.7	Plxdc2	UNKNOWN	SYBR	None							36.2249	35.7383	0.398597						60.0014	TRUE		0.440018		TRUE	3	44	Amp		N	N	Y	Y
61	F1	FALSE	RAW264.7	Plxdc2	UNKNOWN	SYBR	None							35.7416	35.7383	0.398597						75.5472	TRUE	83.1677	0.440018		TRUE	3	30	Amp		N	Y	N	N
38	D2	FALSE	RAW264.7+GL261 GCM	Plxdc2	UNKNOWN	SYBR	None							37.5148	37.5614	0.303378						75.6996	TRUE		0.440018		TRUE	3	32	Amp		N	N	N	N
50	E2	FALSE	RAW264.7+GL261 GCM	Plxdc2	UNKNOWN	SYBR	None							37.2154	37.5614	0.303378						60.0014	TRUE		0.440018		TRUE	3	44	Amp		N	N	Y	Y
62	F2	FALSE	RAW264.7+GL261 GCM	Plxdc2	UNKNOWN	SYBR	None							37.9541	37.5614	0.303378						60.0014	TRUE		0.440018		TRUE	3	44	Amp		N	N	Y	Y
5	A5	FALSE	RAW264.7	Siglec10	UNKNOWN	SYBR	None							35.4898	35.3693	0.241885		-4.86342	2.67371	1.88802		85.3043	TRUE	79.8169	1.22981	69.2993	TRUE	3	27	Amp		N	Y	N	N
17	B5	FALSE	RAW264.7	Siglec10	UNKNOWN	SYBR	None							35.0908	35.3693	0.241885		-4.86342	2.67371	1.88802		84.847	TRUE	82.4082	1.22981	79.8169	TRUE	3	26	Amp		N	Y	N	N	68.842
29	C5	FALSE	RAW264.7	Siglec10	UNKNOWN	SYBR	None							35.5272	35.3693	0.241885		-4.86342	2.67371	1.88802		82.1033	TRUE	69.2993	1.22981		TRUE	3	28	Amp		N	Y	N	N
6	A6	FALSE	RAW264.7+GL261 GCM	Siglec10	UNKNOWN	SYBR	None							36.1356	35.8088	0.288863		12.0932				70.2139	TRUE	79.9693	1.22981	85.1519	TRUE	3	28	Amp		N	Y	N	N
18	B6	FALSE	RAW264.7+GL261 GCM	Siglec10	UNKNOWN	SYBR	None							35.703	35.8088	0.288863		12.0932				82.2557	TRUE		1.22981		TRUE	3	27	Amp		N	N	N	N
30	C6	FALSE	RAW264.7+GL261 GCM	Siglec10	UNKNOWN	SYBR	None							35.5877	35.8088	0.288863		12.0932				81.9509	TRUE		1.22981		TRUE	3	28	Amp		N	N	N	N
8	A8	FALSE	RAW264.7+GL261 GCM+Vorinostat	Siglec10	UNKNOWN	SYBR	None							39.7131	38.719	1.06598		6.685				80.1381	TRUE	85.1724	1.22981		TRUE	3	32	Amp		Y	Y	N	N
20	B8	FALSE	RAW264.7+GL261 GCM+Vorinostat	Siglec10	UNKNOWN	SYBR	None							37.5934	38.719	1.06598		6.685				85.63	TRUE	79.3753	1.22981		TRUE	3	30	Amp		Y	Y	N	N
32	C8	FALSE	RAW264.7+GL261 GCM+Vorinostat	Siglec10	UNKNOWN	SYBR	None							38.8505	38.719	1.06598		6.685				87.003	TRUE	79.5278	1.22981		TRUE	3	29	Amp		Y	Y	N	N
