# Supplementary material for: Interrogation of macrophage-related prognostic signatures reveals a potential immune-mediated therapy strategy by histone deacetylase inhibition in glioma
Source: Front Oncol. 2025 Jun 6;15:1554845. doi: 10.3389/fonc.2025.1554845 (PMC12179195; doi:10.3389/fonc.2025.1554845)
Supplement: Supplementary file 19 [file Table6.xlsx]

## Sheet: Sheet1
Well	Well Position	Omit	Sample Name	Target Name	Task	Reporter	Quencher	Quantity	Quantity Mean	Quantity SD	RQ	RQ Min	RQ Max	CT	Ct Mean	Ct SD	Delta Ct	Delta Ct Mean	Delta Ct SD	Delta Ct SE	Delta Delta Ct	Tm1	Automatic Ct Threshold	Tm2	Ct Threshold	Tm3	Automatic Baseline	Baseline Start	Baseline End	Amp Status	Comments	HIGHSD	MTP	Tm4
1	A1	FALSE	UV	SIRPA	UNKNOWN	SYBR	None							23.1623	23.1514	0.0356692		-7.18932	0.188971	0.109103		86.8913	TRUE		0.394518		TRUE	3	17	Amp		N	N
2	A2	FALSE	UV	TLR3	UNKNOWN	SYBR	None							30.7625	30.4885	0.256863		0.147779	0.316885	0.182954		84.1721	TRUE		0.410801		TRUE	3	24	Amp		N	N
3	A3	FALSE	UV	IL1B	UNKNOWN	SYBR	None							13.5313	13.5484	0.0231536		-16.7924	0.187013	0.107972		83.5918	TRUE		0.431813		TRUE	3	8	Amp		N	N
4	A4	FALSE	UV	IL6	UNKNOWN	SYBR	None							30.4225	30.3408	0.185574						81.9283	TRUE		0.390506		TRUE	3	24	Amp		N	N
5	A5	FALSE	UV	CD40	UNKNOWN	SYBR	None							19.2614	19.272	0.0203823		-11.0688	0.18669	0.107786		85.3908	TRUE		0.386553		TRUE	3	14	Amp		N	N
6	A6	FALSE	UV	PDCD1	UNKNOWN	SYBR	None							31.2058	31.5135	0.472476		1.17274	0.507613	0.293071		86.5999	TRUE		0.180413		TRUE	3	26	Amp		N	N
7	A7	FALSE	UV	ITGA5	UNKNOWN	SYBR	None							24.6645	24.708	0.0409197		-5.63275	0.190032	0.109715		86.7692	TRUE		0.466067		TRUE	3	17	Amp		N	N
8	A8	FALSE	UV	ITGAV	UNKNOWN	SYBR	None							20.8726	20.8931	0.0578172		-9.44766	0.194373	0.112221		81.476	TRUE		0.436711		TRUE	3	14	Amp		N	N
9	A9	FALSE	UV	ITGB3	UNKNOWN	SYBR	None							21.3156	21.3456	0.0269745		-8.99517	0.187525	0.108267		85.4847	TRUE		0.483443		TRUE	3	15	Amp		N	N
10	A10	FALSE	UV	GAPDH1	UNKNOWN	SYBR	None							14.9542	14.969	0.0271594		-15.3718	0.187551	0.108283		84.4292	TRUE		0.435947		TRUE	3	9	Amp		N	N
11	A11	FALSE	UV	CD163	UNKNOWN	SYBR	None							31.7812	31.7631	0.174459		1.42236	0.254703	0.147053		81.6375	TRUE		0.332614		TRUE	3	25	Amp		N	N
12	A12	FALSE	UV	CD206	UNKNOWN	SYBR	None							31.862	32.3836	0.471451		2.04286	0.506659	0.29252		81.0323	TRUE	88.4463	0.23697	74.8287	TRUE	3	26	Amp		N	Y
13	B1	FALSE	UV	SIRPA	UNKNOWN	SYBR	None							23.1116	23.1514	0.0356692		-7.18932	0.188971	0.109103		86.7402	TRUE		0.394518		TRUE	3	17	Amp		N	N
14	B2	FALSE	UV	TLR3	UNKNOWN	SYBR	None							30.2532	30.4885	0.256863		0.147779	0.316885	0.182954		84.021	TRUE		0.410801		TRUE	3	23	Amp		N	N
15	B3	FALSE	UV	IL1B	UNKNOWN	SYBR	None							13.5747	13.5484	0.0231536		-16.7924	0.187013	0.107972		83.5918	TRUE		0.431813		TRUE	3	8	Amp		N	N
16	B4	FALSE	UV	IL6	UNKNOWN	SYBR	None							30.4715	30.3408	0.185574						81.9283	TRUE		0.390506		TRUE	3	24	Amp		N	N
17	B5	FALSE	UV	CD40	UNKNOWN	SYBR	None							19.2955	19.272	0.0203823		-11.0688	0.18669	0.107786		85.2397	TRUE		0.386553		TRUE	3	14	Amp		N	N
18	B6	FALSE	UV	PDCD1	UNKNOWN	SYBR	None							32.0575	31.5135	0.472476		1.17274	0.507613	0.293071		86.5999	TRUE		0.180413		TRUE	3	26	Amp		N	N
19	B7	FALSE	UV	ITGA5	UNKNOWN	SYBR	None							24.7457	24.708	0.0409197		-5.63275	0.190032	0.109715		86.618	TRUE		0.466067		TRUE	3	18	Amp		N	N
20	B8	FALSE	UV	ITGAV	UNKNOWN	SYBR	None							20.8483	20.8931	0.0578172		-9.44766	0.194373	0.112221		81.476	TRUE		0.436711		TRUE	3	14	Amp		N	N
21	B9	FALSE	UV	ITGB3	UNKNOWN	SYBR	None							21.368	21.3456	0.0269745		-8.99517	0.187525	0.108267		85.3339	TRUE		0.483443		TRUE	3	14	Amp		N	N
22	B10	FALSE	UV	GAPDH1	UNKNOWN	SYBR	None							15.0004	14.969	0.0271594		-15.3718	0.187551	0.108283		84.2784	TRUE		0.435947		TRUE	3	9	Amp		N	N
23	B11	FALSE	UV	CD163	UNKNOWN	SYBR	None							31.5803	31.7631	0.174459		1.42236	0.254703	0.147053		81.7888	TRUE		0.332614		TRUE	3	26	Amp		N	N
24	B12	FALSE	UV	CD206	UNKNOWN	SYBR	None							32.7793	32.3836	0.471451		2.04286	0.506659	0.29252		87.3872	TRUE	74.8287	0.23697	81.3349	TRUE	3	27	Amp		N	Y
25	C1	FALSE	UV	SIRPA	UNKNOWN	SYBR	None							23.1804	23.1514	0.0356692		-7.18932	0.188971	0.109103		86.5892	TRUE		0.394518		TRUE	3	17	Amp		N	N
26	C2	FALSE	UV	TLR3	UNKNOWN	SYBR	None							30.4499	30.4885	0.256863		0.147779	0.316885	0.182954		84.021	TRUE		0.410801		TRUE	3	24	Amp		N	N
27	C3	FALSE	UV	IL1B	UNKNOWN	SYBR	None							13.5391	13.5484	0.0231536		-16.7924	0.187013	0.107972		83.5918	TRUE		0.431813		TRUE	3	8	Amp		N	N
28	C4	FALSE	UV	IL6	UNKNOWN	SYBR	None							30.1284	30.3408	0.185574						81.7771	TRUE		0.390506		TRUE	3	24	Amp		N	N
29	C5	FALSE	UV	CD40	UNKNOWN	SYBR	None							19.2591	19.272	0.0203823		-11.0688	0.18669	0.107786		85.0886	TRUE		0.386553		TRUE	3	13	Amp		N	N
30	C6	FALSE	UV	PDCD1	UNKNOWN	SYBR	None							31.2773	31.5135	0.472476		1.17274	0.507613	0.293071		86.4488	TRUE		0.180413		TRUE	3	26	Amp		N	N
31	C7	FALSE	UV	ITGA5	UNKNOWN	SYBR	None							24.7138	24.708	0.0409197		-5.63275	0.190032	0.109715		86.618	TRUE		0.466067		TRUE	3	18	Amp		N	N
32	C8	FALSE	UV	ITGAV	UNKNOWN	SYBR	None							20.9584	20.8931	0.0578172		-9.44766	0.194373	0.112221		81.3248	TRUE		0.436711		TRUE	3	15	Amp		N	N
33	C9	FALSE	UV	ITGB3	UNKNOWN	SYBR	None							21.3532	21.3456	0.0269745		-8.99517	0.187525	0.108267		85.1831	TRUE		0.483443		TRUE	3	15	Amp		N	N
34	C10	FALSE	UV	GAPDH1	UNKNOWN	SYBR	None							14.9525	14.969	0.0271594		-15.3718	0.187551	0.108283		84.1276	TRUE		0.435947		TRUE	3	9	Amp		N	N
35	C11	FALSE	UV	CD163	UNKNOWN	SYBR	None							31.9278	31.7631	0.174459		1.42236	0.254703	0.147053		81.6375	TRUE		0.332614		TRUE	3	26	Amp		N	N
36	C12	FALSE	UV	CD206	UNKNOWN	SYBR	None							32.5095	32.3836	0.471451		2.04286	0.506659	0.29252		75.2827	TRUE	88.7489	0.23697		TRUE	3	26	Amp		N	Y
Well	Well Position	Omit	Sample Name	Target Name	Task	Reporter	Quencher	Quantity	Quantity Mean	Quantity SD	RQ	RQ Min	RQ Max	CT	Ct Mean	Ct SD	Delta Ct	Delta Ct Mean	Delta Ct SD	Delta Ct SE	Delta Delta Ct	Tm1	Automatic Ct Threshold	Tm2	Ct Threshold	Tm3	Automatic Baseline	Baseline Start	Baseline End	Amp Status	Comments	MTP	Tm4
37	D1	FALSE	U	SIRPA	UNKNOWN	SYBR	None				9.52744	7.64035	11.8806	25.5903	25.6676	0.0702289		-3.69759	0.198661	0.114697	-3.25209	86.0144	TRUE		0.443057		TRUE	3	19	Amp		N
38	D2	FALSE	U	TLR3	UNKNOWN	SYBR	None				14.0753	10.7456	18.4368	31.0389	31.0318	0.156473		1.66658	0.242936	0.140259	-3.8151	83.636	TRUE		0.392387		TRUE	3	24	Amp		N
39	D3	FALSE	U	IL1B	UNKNOWN	SYBR	None				20.7429	16.7891	25.6278	13.8245	13.8718	0.0411232		-15.4934	0.190329	0.109887	-4.37454	83.1986	TRUE		0.449554		TRUE	3	7	Amp		N
40	D4	FALSE	U	IL6	UNKNOWN	SYBR	None							29.5795	29.3652	0.185834						81.4142	TRUE		0.438717		TRUE	3	23	Amp		N
41	D5	FALSE	U	CD40	UNKNOWN	SYBR	None				12.4845	10.1166	15.4066	20.7447	20.7825	0.035958		-8.58274	0.189281	0.109281	-3.64207	84.679	TRUE		0.410862		TRUE	3	14	Amp		N
42	D6	FALSE	U	PDCD1	UNKNOWN	SYBR	None				8.8875	6.08907	12.972	33.7993	33.7651	0.285124		4.39992	0.340338	0.196494	-3.15178	85.8683	TRUE	74.7187	0.343745		TRUE	3	28	Amp		Y
43	D7	FALSE	U	ITGA5	UNKNOWN	SYBR	None				13.6481	11.0219	16.9001	26.3096	26.2562	0.0496395		-3.10901	0.192349	0.111053	-3.77063	85.8768	TRUE		0.435694		TRUE	3	20	Amp		N
44	D8	FALSE	U	ITGAV	UNKNOWN	SYBR	None				16.9264	13.7489	20.8382	22.7231	22.7343	0.0219364		-6.63094	0.187124	0.108036	-4.0812	80.9694	TRUE		0.416656		TRUE	3	16	Amp		N
45	D9	FALSE	U	ITGB3	UNKNOWN	SYBR	None				10.0589	8.18212	12.3661	23.082	23.0853	0.00281129		-6.27993	0.185855	0.107303	-3.3304	84.8036	TRUE		0.465049		TRUE	3	17	Amp		N
46	D10	FALSE	U	GAPDH	UNKNOWN	SYBR	None				21.2306	17.1418	26.2946	15.1101	15.1628	0.050345		-14.2024	0.192533	0.111159	-4.40807	83.7639	TRUE		0.432522		TRUE	3	9	Amp		N
47	D11	FALSE	U	CD163	UNKNOWN	SYBR	None				5.83703	4.53234	7.5173	31.196	31.0852	0.131559		1.72002	0.227688	0.131456	-2.54524	81.2727	TRUE		0.375351		TRUE	3	25	Amp		N
48	D12	FALSE	U	CD206	UNKNOWN	SYBR	None				22.8268	15.547	33.5154	32.5316	32.8042	0.291462		3.43901	0.345665	0.19957	-4.51266	75.9176	TRUE		0.385769		TRUE	3	26	Amp		N
49	E1	FALSE	U	SIRPA	UNKNOWN	SYBR	None				9.52744	7.64035	11.8806	25.685	25.6676	0.0702289		-3.69759	0.198661	0.114697	-3.25209	86.0144	TRUE		0.443057		TRUE	3	19	Amp		N
50	E2	FALSE	U	TLR3	UNKNOWN	SYBR	None				14.0753	10.7456	18.4368	31.1846	31.0318	0.156473		1.66658	0.242936	0.140259	-3.8151	83.636	TRUE		0.392387		TRUE	3	24	Amp		N
51	E3	FALSE	U	IL1B	UNKNOWN	SYBR	None				20.7429	16.7891	25.6278	13.8995	13.8718	0.0411232		-15.4934	0.190329	0.109887	-4.37454	83.0499	TRUE		0.449554		TRUE	3	8	Amp		N
52	E4	FALSE	U	IL6	UNKNOWN	SYBR	None							29.2491	29.3652	0.185834						81.2655	TRUE		0.438717		TRUE	3	23	Amp		N
53	E5	FALSE	U	CD40	UNKNOWN	SYBR	None				12.4845	10.1166	15.4066	20.7863	20.7825	0.035958		-8.58274	0.189281	0.109281	-3.64207	84.679	TRUE		0.410862		TRUE	3	15	Amp		N
54	E6	FALSE	U	PDCD1	UNKNOWN	SYBR	None				8.8875	6.08907	12.972	34.0316	33.7651	0.285124		4.39992	0.340338	0.196494	-3.15178	85.7197	TRUE	74.8674	0.343745		TRUE	3	28	Amp		Y
55	E7	FALSE	U	ITGA5	UNKNOWN	SYBR	None				13.6481	11.0219	16.9001	26.2474	26.2562	0.0496395		-3.10901	0.192349	0.111053	-3.77063	85.8768	TRUE		0.435694		TRUE	3	19	Amp		N
56	E8	FALSE	U	ITGAV	UNKNOWN	SYBR	None				16.9264	13.7489	20.8382	22.7201	22.7343	0.0219364		-6.63094	0.187124	0.108036	-4.0812	80.8206	TRUE		0.416656		TRUE	3	16	Amp		N
57	E9	FALSE	U	ITGB3	UNKNOWN	SYBR	None				10.0589	8.18212	12.3661	23.0867	23.0853	0.00281129		-6.27993	0.185855	0.107303	-3.3304	84.655	TRUE		0.465049		TRUE	3	16	Amp		N
58	E10	FALSE	U	GAPDH	UNKNOWN	SYBR	None				21.2306	17.1418	26.2946	15.2104	15.1628	0.050345		-14.2024	0.192533	0.111159	-4.40807	83.6154	TRUE		0.432522		TRUE	3	9	Amp		N
59	E11	FALSE	U	CD163	UNKNOWN	SYBR	None				5.83703	4.53234	7.5173	30.9398	31.0852	0.131559		1.72002	0.227688	0.131456	-2.54524	81.2727	TRUE		0.375351		TRUE	3	25	Amp		N
60	E12	FALSE	U	CD206	UNKNOWN	SYBR	None				22.8268	15.547	33.5154	33.1114	32.8042	0.291462		3.43901	0.345665	0.19957	-4.51266	81.124	TRUE	74.4301	0.385769		TRUE	3	26	Amp		Y
61	F1	FALSE	U	SIRPA	UNKNOWN	SYBR	None				9.52744	7.64035	11.8806	25.7275	25.6676	0.0702289		-3.69759	0.198661	0.114697	-3.25209	86.0144	TRUE		0.443057		TRUE	3	19	Amp		N
62	F2	FALSE	U	TLR3	UNKNOWN	SYBR	None				14.0753	10.7456	18.4368	30.8719	31.0318	0.156473		1.66658	0.242936	0.140259	-3.8151	83.636	TRUE		0.392387		TRUE	3	25	Amp		N
63	F3	FALSE	U	IL1B	UNKNOWN	SYBR	None				20.7429	16.7891	25.6278	13.8913	13.8718	0.0411232		-15.4934	0.190329	0.109887	-4.37454	83.0499	TRUE		0.449554		TRUE	3	8	Amp		N
64	F4	FALSE	U	IL6	UNKNOWN	SYBR	None							29.267	29.3652	0.185834						81.2655	TRUE		0.438717		TRUE	3	23	Amp		N
65	F5	FALSE	U	CD40	UNKNOWN	SYBR	None				12.4845	10.1166	15.4066	20.8164	20.7825	0.035958		-8.58274	0.189281	0.109281	-3.64207	84.5304	TRUE		0.410862		TRUE	3	14	Amp		N
66	F6	FALSE	U	PDCD1	UNKNOWN	SYBR	None				8.8875	6.08907	12.972	33.4644	33.7651	0.285124		4.39992	0.340338	0.196494	-3.15178	85.7197	TRUE		0.343745		TRUE	3	26	Amp		N
67	F7	FALSE	U	ITGA5	UNKNOWN	SYBR	None				13.6481	11.0219	16.9001	26.2115	26.2562	0.0496395		-3.10901	0.192349	0.111053	-3.77063	85.8768	TRUE		0.435694		TRUE	3	20	Amp		N
68	F8	FALSE	U	ITGAV	UNKNOWN	SYBR	None				16.9264	13.7489	20.8382	22.7595	22.7343	0.0219364		-6.63094	0.187124	0.108036	-4.0812	80.8206	TRUE		0.416656		TRUE	3	16	Amp		N
69	F9	FALSE	U	ITGB3	UNKNOWN	SYBR	None				10.0589	8.18212	12.3661	23.0871	23.0853	0.00281129		-6.27993	0.185855	0.107303	-3.3304	84.655	TRUE		0.465049		TRUE	3	16	Amp		N
70	F10	FALSE	U	GAPDH	UNKNOWN	SYBR	None				21.2306	17.1418	26.2946	15.1679	15.1628	0.050345		-14.2024	0.192533	0.111159	-4.40807	83.6154	TRUE		0.432522		TRUE	3	8	Amp		N
71	F11	FALSE	U	CD163	UNKNOWN	SYBR	None				5.83703	4.53234	7.5173	31.1199	31.0852	0.131559		1.72002	0.227688	0.131456	-2.54524	81.124	TRUE		0.375351		TRUE	3	24	Amp		N
72	F12	FALSE	U	CD206	UNKNOWN	SYBR	None				22.8268	15.547	33.5154	32.7696	32.8042	0.291462		3.43901	0.345665	0.19957	-4.51266	80.9752	TRUE	76.2151	0.385769	88.1154	TRUE	3	26	Amp		Y
